# Supplementary material
Source: publisher figshare collection journal article supplement (https://acs.figshare.com/ndownloader/files/21484329)
Supplement: Supplementary file 1 [file 21484329]

## Sheet: Sheet1
glycopeptide	N1	N2	N3	N4	Z1	Z2	Z3	Z4
sp|Q08380|LG3BP_HUMAN-AAIPSALDTJSSK&1476.730794	0.633161	0.753009	0.656742	0.731354	0.815968	0.748623	0.853567	0.795484
sp|P02765|FETUA_HUMAN-AALAAFNAQNJGSNFQLEEISR&2567.225234	0.571119	0.607664	0.368915	0.43354	0.688651	0.624007	0.674781	0.595504
sp|P13598|ICAM2_HUMAN-AAPAPQEATATFJSTADR&2020.933814	1	1	1	1	1	1	0.910509	1
sp|P13598|ICAM2_HUMAN-AAPAPQEATATFJSTADREDGHR&2615.184834	1	0.952336	1	1	1	1	1	1
sp|Q92673|SORL_HUMAN-AASJFTEIK&1182.576864	1	0.980154	1	1	-1	0	0	1
sp|Q15223|PVRL1_HUMAN-ADANPPATEYHWTTLJGSLPK&2485.176154	1	1	1	1	1	1	1	1
sp|P05090|APOD_HUMAN-ADGTVNQIEGEATPVJLTEPAK&2456.191874	0.962833	0.952313	0.944352	0.967244	0.964326	0.951861	0.959138	0.958527
sp|P05090|APOD_HUMAN-ADGTVNQIEGEATPVJLTEPAKLEVK&2925.481904	0.98143	0.972806	0.970908	0.980379	0.979063	0.971613	0.979457	0.979292
sp|P01009|A1AT_HUMAN-ADTHDEILEGLNFJLTEIPEAQIHEGFQELLR&3893.895974	-1	-1	-1	-1	0.677524	0.676453	0.551474	0.718627
sp|Q8NFZ8|CADM4_HUMAN-AEAVGETLTLPGLVSADJGTYTCEASNK&3070.428874	0.930184	0.964086	0.964324	1	0.977001	0.97136	0.971061	0.991112
sp|O95633|FSTL3_HUMAN-AECCASGNIDTAWSJLTHPGNK&2605.117334	1	1	1	1	-1	-1	1	-1
sp|O00241|SIRB1_HUMAN-AENQAJVTCQVSNFYPR&2199.985514	0.437139	0.451799	0.412586	0.520193	0.615598	0.580213	0.655495	0.544704
sp|P51884|LUM_HUMAN-AFEJVTDLQWLILDHNLLENSK&2814.407624	0	1	1	1	1	1	1	1
sp|P22792|CPN2_HUMAN-AFGSNPJLTK&1250.614314	0.789852	0.67883	0.831637	0.797078	-1	-1	-1	1
sp|P16070|CD44_HUMAN-AFJSTLPTMAQMEK&1770.816854	0.286601	0.989879	0.982895	0.98981	0.981609	0.982527	0.983119	0.986417
sp|Q504Y2|PKDCC_HUMAN-AFVVTJQTTWTGR&1682.826434	1	1	1	-1	-1	-1	-1	-1
sp|P29323|EPHB2_HUMAN-AGFEAVEJGTVCR&1611.719914	1	1	1	1	1	1	1	1
sp|P36941|TNR3_HUMAN-AGHFQJTSSPSAR&1561.712124	1	1	1	1	-1	-1	-1	-1
sp|Q9Y334|VWA7_HUMAN-AHLELJESAWGR&1584.753264	1	1	1	1	0.750672	1	1	0.747946
sp|Q9UNN8|EPCR_HUMAN-AHVFFEVAVJGSSFVSFRPER&2584.271064	1	0.70355	0.668416	1	-1	-1	0.961363	1
sp|Q02487|DSC2_HUMAN-AIJDTAAR&1033.504034	0.386564	0.43079	0.305564	0.508567	-1	-1	-1	-1
sp|Q08174|PCDH1_HUMAN-AJDSDQGANAEIEYTFHQAPEVVR&2863.289684	1	0.88796	0.852436	0.924662	0.831683	0.802086	0.779223	0.866259
sp|P16444|DPEP1_HUMAN-AJLSQVADHLDHIK&1762.885004	-1	0.942624	0.998259	1	0.941064	0.922794	0.976844	0.961901
sp|P16444|DPEP1_HUMAN-AJLTTLAGTHTNIPK&1753.921064	0.74767	0.858582	0.861382	0.836954	0.922147	0.857476	0.91019	0.927647
sp|P05362|ICAM1_HUMAN-AJLTVVLLR&1200.707814	0.876137	0.803081	0.69697	0.728203	0.725538	0.854506	0.809694	0.762025
sp|Q12860|CNTN1_HUMAN-AJSTGTLVITDPTR&1647.831574	1	1	1	1	1	1	0.977629	1
sp|P35968|VGFR2_HUMAN-AJTTLQITCR&1379.671504	0.0657704	0.0487797	0.0281967	0.0376625	0.108401	0.109369	0.0532783	0.0512812
sp|Q02487|DSC2_HUMAN-AJYTILK&1024.544094	0.992104	0.979901	0.98608	1	-1	1	-1	1
sp|P08294|SODE_HUMAN-AKLDAFFALEGFPTEPJSSSR&2486.196564	1	1	1	1	1	1	1	1
sp|Q9HAT2|SIAE_HUMAN-ALAYGEKJLTFEGPLPEK&2179.104884	1	1	1	1	1	1	1	1
sp|Q8N271|PROM2_HUMAN-ALESSAPNLQLETSDVLAJVTYLK&2778.417504	-1	1	1	1	1	1	1	1
sp|Q08380|LG3BP_HUMAN-ALGFEJATQALGR&1549.773664	0.976815	0.982976	0.93918	0.986891	0.99517	0.996669	0.994155	0.997435
sp|Q9Y6H6|KCNE3_HUMAN-ALJATLHSNLLCR&1684.856684	0.623289	0.65968	1	0.595524	0.717946	0.654246	1	0.709218
sp|Q7Z7M0|MEGF8_HUMAN-ALLTJVSSVALGSR&1589.862484	1	0.979062	0.955564	1	0.969612	0.960461	0.958899	0.967004
sp|P35613|BASI_HUMAN-ALMJGSESR&1166.523784	1	1	1	1	-1	-1	-1	-1
sp|P02790|HEMO_HUMAN-ALPQPQJVTSLLGCTH&1937.951704	0.0733385	0.130792	0.0380089	0.0580984	0.176547	0.0189689	0.116544	0.0765411
sp|O15031|PLXB2_HUMAN-ALSJISLR&1075.587364	1	1	1	1	1	1	1	1
sp|Q9Y6Q6|TNR11_HUMAN-ALVAVVAGJSTTPR&1557.836264	1	1	1	1	0.89281	0.935231	0.995854	1
sp|O95998|I18BP_HUMAN-ALVLEQLTPALHSTJFSCVLVDPEQVVQR&3465.781404	0.998156	0.995564	0.995241	0.998728	0.993072	0.992616	0.991962	0.995037
sp|Q9UNN8|EPCR_HUMAN-ALWQADTQVTSGVVTFTLQQLNAYJR&3126.562214	-1	-1	-1	-1	1	1	1	1
sp|Q14982|OPCM_HUMAN/sp|Q9P121|NTRI_HUMAN-AMDJVTVR&1107.523054	0.996793	0.996574	0.997619	1	-1	1	1	-1
sp|Q8IZF2|AGRF5_HUMAN-ANEQVVQSLJQTYK&1823.890144	1	1	1	1	0.99013	0.991133	0.987227	0.990086
sp|Q86VB7|C163A_HUMAN-APGWAJSSAGSGR&1419.637904	1	1	1	1	-1	1	-1	1
sp|Q86YD3|TMM25_HUMAN-AQHELJCSLQDPR&1769.800284	0.0470948	0.486175	0.256539	0.421305	0.153024	0.2174	0.813196	0.163517
sp|Q9UGT4|SUSD2_HUMAN-AQPGTMSJGTETR&1551.683534	1	1	1	1	1	-1	-1	-1
sp|P25311|ZA2G_HUMAN-AREDIFMETLKDIVEYYJDSJGSHVLQGR&3601.699504	-1	-1	-1	-1	1	1	0.880787	1
sp|P54108|CRIS3_HUMAN-ASCJCSNSIY&1377.517694	0.889814	1	1	1	-1	1	-1	1
sp|O96009|NAPSA_HUMAN-ASSSFQAJGTK&1299.594304	0.730376	0.3316	0.590779	0.666673	-1	-1	-1	-1
sp|Q5SZK8|FREM2_HUMAN-ATVSIJDSVSDLPK&1647.820344	0.980105	1	0.952296	0.963808	0.955791	0.937101	0.92602	0.931862
sp|Q96J84|KIRR1_HUMAN-AVLPCVLLJYSGIVQWTK&2263.192264	1	1	1	1	1	1	1	1
sp|Q8NBJ4|GOLM1_HUMAN-AVLVNJITTGER&1488.778414	0.757682	0.727883	0.747224	0.729084	0.676771	0.684098	0.691123	0.727849
sp|P35555|FBN1_HUMAN-AWGTPCEMCPAVJTSEYK&2302.954474	1	1	1	1	1	1	1	1
sp|O00584|RNT2_HUMAN-AYWPDVIHSFPJR&1803.858054	-1	-1	0.0906348	0.119542	0.0881163	0.0718984	0.196901	0.0887828
sp|P08962|CD63_HUMAN-CCGAAJYTDWEK&1676.644684	-1	1	-1	1	0.953533	1	1	1
sp|O75882|ATRN_HUMAN-CIJQSICEK&1353.590474	1	1	1	1	1	1	1	1
sp|P05090|APOD_HUMAN-CIQAJYSLMENGK&1729.765134	0.140515	0.0569603	0.034963	0.100052	0.139037	0.101238	0.0989402	0.0965576
sp|Q96FE7|P3IP1_HUMAN-CLNWLDAQSGLASAPVSGAGJHSYCR&2993.339614	1	0.998351	1	1	1	1	1	1
sp|Q96NY8|PVRL4_HUMAN-CLSEGQPPPSYJWTR&1993.884004	1	1	1	1	1	1	1	1
sp|P07911|UROM_HUMAN-CNTAAPMWLJGTHPSSDEGIVSR&2702.206494	1	0	0	0.921114	0	0.980477	-1	0
sp|Q16281|CNGA3_HUMAN-CNTJTSJNTEEEK&1742.690134	1	1	1	1	1	1	1	1
sp|O95967|FBLN4_HUMAN-CQCEPGFQLGPNJR&1878.798904	1	1	1	1	1	0.948514	1	1
sp|P43121|MUC18_HUMAN-CVASVPSIPGLJR&1571.797764	0.943587	1	1	1	1	1	-1	1
sp|Q01973|ROR1_HUMAN-CYJSTGVDYR&1436.587814	1	1	1	1	1	1	1	1
sp|Q99574|NEUS_HUMAN-DAJLTGLSDNK&1349.631084	1	1	1	1	1	1	1	1
sp|Q99574|NEUS_HUMAN-DAJLTGLSDNKEIFLSK&2067.037214	1	1	1	1	1	1	1	1
sp|P08195|4F2_HUMAN-DASSFLAEWQJITK&1811.857794	1	0.865225	1	1	1	1	0.940514	1
sp|Q4LDE5|SVEP1_HUMAN-DAVITGNJFTFR&1556.747114	1	0	1	1	0.447936	0.486794	0.830623	1
sp|P98164|LRP2_HUMAN-DCJATTEFMCNNR&1834.692054	-1	1	1	1	1	1	1	1
sp|Q14767|LTBP2_HUMAN-DECWCPAJSTGK&1626.629044	0.822249	-1	0.768716	1	0.941735	0.755967	0.901506	0.832394
sp|P04216|THY1_HUMAN-DEGTYTCALHHSGHSPPISSQJVTVLR&3165.478554	0.983902	0.989474	1	0.956003	0.988809	0.977274	0.986661	0.98795
sp|Q9H6X2|ANTR1_HUMAN-DFJETQLAR&1295.599394	1	0.990185	1	0.937319	1	0.983809	0.988902	0.983194
sp|O60494|CUBN_HUMAN-DFVEIWDJHTSGNILGR&2175.023294	1	1	1	1	0.990943	0.975364	0.989123	0.988781
sp|P29622|KAIN_HUMAN-DFYVDEJTTVR&1560.694404	1	1	0.85893	0.838	0.829412	0.825599	0.868853	0.803631
sp|P13727|PRG2_HUMAN-DGAVESISVPDMVDKJLTCPEEEDTVK&3179.437394	1	1	1	1	1	1	1	1
sp|O60449|LY75_HUMAN-DGHGTAISJASDVWK&1759.801334	1	1	1	1	-1	1	1	1
sp|Q07954|LRP1_HUMAN-DGTCIGJSSR&1268.530324	0.580414	0.651095	0.688371	1	-1	-1	-1	-1
sp|Q13308|PTK7_HUMAN-DGTPLSDGQSJHTVSSK&1931.870874	1	1	1	1	-1	1	1	1
sp|Q14767|LTBP2_HUMAN-DGTQQAVPLEHPSSPWGLJLTEK&2706.313724	0.966021	1	0.939071	0.956147	0.963725	0.948508	1	1
sp|P21802|FGFR2_HUMAN-DGVHLGPNJR&1280.610954	0.99761	1	1	1	-1	-1	-1	-1
sp|P11362|FGFR1_HUMAN-DGVQLAESJR&1290.605204	0.863466	1	1	1	-1	-1	-1	-1
sp|Q8TDL5|BPIB1_HUMAN-DHJATSILQQLPLLSAMR&2210.136544	-1	1	1	1	-1	1	1	1
sp|Q9BRN9|TM2D3_HUMAN-DHVHCLGJR&1309.583364	1	1	1	1	-1	-1	-1	-1
sp|Q99523|SORT_HUMAN-DITDLIJNTFIR&1636.830844	1	0.823032	0.925801	1	0.905754	0.954997	0.746535	0.954466
sp|P25311|ZA2G_HUMAN-DIVEYYJDSJGSHVLQGR&2268.029484	0.899779	0.941725	0.904544	0.918285	0.921327	0.947037	0.774035	0.800464
sp|Q08722|CD47_HUMAN-DIYTFDGALJK&1458.687864	0.557012	0.740441	0.511419	0.660116	0.417354	0.529292	0.909917	0.586903
sp|O75882|ATRN_HUMAN-DLDMFIJASK&1355.627914	0.94994	0.949295	1	1	0.949894	0.955126	0.960675	0.960727
sp|O14498|ISLR_HUMAN-DLESVPPGFPAJVTTLSLSANR&2487.249324	1	1	1	1	1	1	1	0.936265
sp|Q9BZR6|RTN4R_HUMAN-DLGJLTHLFLHGNR&1808.916974	-1	-1	-1	0.850577	1	0.866244	1	1
sp|P04062|GLCM_HUMAN-DLGPTLAJSTHHNVR&1833.896974	0.490522	0.803393	0.805107	0.744322	0.598142	0.576675	0.511169	0.616907
sp|Q96PX8|SLIK1_HUMAN-DLJETTEQDLCPLK&1877.856464	0.723888	0.685924	1	1	0.323854	0.310615	0.520627	0.61884
sp|Q06418|TYRO3_HUMAN-DLVPATJYSLR&1450.730394	1	1	1	1	1	1	1	1
sp|P55290|CAD13_HUMAN-DPAGWLNINPIJGTVDTTAVLDR&2654.318804	1	1	1	1	1	1	0.887305	1
sp|P28300|LYOX_HUMAN-DPGAAVPGAAJASAQQPR&1879.902454	0.995826	0.991985	0.982921	0.995889	1	1	1	1
sp|P02751|FINC_HUMAN-DQCIVDDITYNVJDTFHK&2399.058744	0.955802	0.892674	0.916858	0.915313	0.912446	0.887035	0.928734	0.954142
sp|Q5ZPR3|CD276_HUMAN-DQGSAYAJR&1183.510564	1	1	1	1	-1	-1	-1	-1
sp|Q6UX06|OLFM4_HUMAN-DQNTPVVHPPPTPGSCGHGGVVJISKPSVVQLNWR&3932.959194	1	1	1	0.945656	1	0.896885	1	0.965264
sp|O14917|PCD17_HUMAN-DSGAPAHLESJATVR&1726.812234	1	1	1	1	1	1	1	1
sp|Q01973|ROR1_HUMAN-DSYLTLDEPMNJITTSLGQTAELHCK&3153.448234	1	1	1	1	1	1	1	1
sp|P05155|IC1_HUMAN-DTFVJASR&1111.514594	0.987772	0.989199	0.983448	0.993205	1	-1	1	1
sp|P23284|PPIB_HUMAN-DTJGSQFFITTVK&1659.799214	1	0.35846	0.453295	0.104307	0.612123	0.440327	0.685615	0.628378
sp|Q7Z5N4|SDK1_HUMAN-DVGTPETMAPTIVVPPGJR&2153.067464	1	1	1	1	1	1	1	1
sp|P53634|CATC_HUMAN-DVJCSVMGPQEK&1565.670184	0.20283	0.376041	0.272649	0.30253	0.56268	0.34833	0.517744	0.31787
sp|P43251|BTD_HUMAN-DVQIIVFPEDGIHGFJFTR&2406.185604	1	0.989577	0.988525	0.978002	0.971811	0.973548	0.958796	0.978454
sp|P07602|SAP_HUMAN-DVVTAAGDMLKDJATEEEILVYLEK&2968.447484	1	1	1	1	1	1	1	1
sp|P10909|CLUS_HUMAN-EDALJETR&1149.514994	0.990509	0.990704	0.990966	1	-1	1	1	-1
sp|P10909|CLUS_HUMAN-EDALJETRESETK&1723.774844	0.293351	1	0.808378	0.768765	1	0	-1	0
sp|P55285|CADH6_HUMAN-EDAQIJTTIGSVTAQDPDAAR&2375.108874	1	0.967536	1	1	1	1	1	1
sp|P13598|ICAM2_HUMAN-EDGHRJFSCLAVLDLMSR&2322.073294	0.197649	0.0373563	0.0388236	0	0.0110414	0.0176992	0.299332	0
sp|A8MVW5|HECA2_HUMAN-EDIGJYSCLVR&1527.687544	1	1	1	1	1	1	1	1
sp|P80188|NGAL_HUMAN-EDKSYJVTSVLFR&1759.862864	1	0.863862	1	0.569396	-1	0	-1	-1
sp|P05154|IPSP_HUMAN-EDQYHYLLDRJLSCR&2183.990594	1	-1	1	0.99625	1	1	1	1
sp|P01859|IGHG2_HUMAN-EEQFJSTFR&1359.594304	0.996336	0.992726	0.993077	0.990857	0.993613	0.989783	0.993126	0.993811
sp|P01861|IGHG4_HUMAN-EEQFJSTYR&1375.589214	1	1	0.998024	1	-1	1	-1	1
sp|P01860|IGHG3_HUMAN-EEQYJSTFR&1375.589214	1	1	0.998024	1	-1	1	-1	1
sp|P01857|IGHG1_HUMAN-EEQYJSTYR&1391.584114	0.988932	0.991278	0.991234	0.995601	1	1	1	1
sp|Q9ULV1|FZD4_HUMAN-EFGFAWPESLJCSK&1873.819294	0.989649	0.981009	0.975709	0.984594	0.983532	0.976997	0.988647	0.980163
sp|Q4LDE5|SVEP1_HUMAN-EFYVDQJVSIK&1543.740624	1	1	1	1	1	1	1	1
sp|P16871|IL7RA_HUMAN-EGANDFVVTFJTSHLQK&2109.001494	0	1	1	1	1	1	1	1
sp|O60494|CUBN_HUMAN-EGJATGHLVGR&1312.637174	0.9671	0.969202	0.94987	0.986506	-1	-1	-1	-1
sp|P43626|KI2L1_HUMAN/sp|Q14954|KI2S1_HUMAN-EGMFJDTLR&1284.565644	1	1	1	1	0.798339	0.728105	0.333708	0.206069
sp|P00450|CERU_HUMAN-EHEGAIYPDJTTDFQR&2094.913064	0.89173	0.965742	0.790434	0.839757	0.906882	0.875118	0.855073	0.865906
sp|Q6UXB8|PI16_HUMAN-EHYJLSAATCSPGQMCGHYTQVVWAK&3197.400494	-1	1	1	1	0.989974	1	1	1
sp|O95297|MPZL1_HUMAN-EIFVAJGTQGK&1365.677644	1	1	1	1	-1	1	-1	1
sp|P10909|CLUS_HUMAN-EIRHJSTGCLR&1544.736564	0.324906	0.856609	0.836315	0.847539	-1	-1	1	-1
sp|P28799|GRN_HUMAN-EJATTDLLTK&1307.645674	1	1	1	1	1	1	1	1
sp|P01591|IGJ_HUMAN-EJISDPTSPLR&1430.688934	0.853913	0.760458	0.761333	0.766556	0.83842	0.827435	0.825452	0.881268
sp|P01133|EGF_HUMAN-EJISQPR&1045.504034	0.94851	0.94594	0.918361	1	-1	-1	-1	-1
sp|P00450|CERU_HUMAN-EJLTAPGSDSAVFFEQGTTR&2329.071034	0.579345	0.757631	0.364736	0.516827	0.561687	0.535052	0.397258	0.422854
sp|Q86YD3|TMM25_HUMAN-EJMSLPSNLQLNDLTPDSR&2346.100944	1	1	1	1	1	1	1	1
sp|P00749|UROK_HUMAN-EJSTDYLYPEQLK&1801.825804	1	1	0.894463	1	0.968753	0.957428	0.952953	0.975266
sp|P11279|LAMP1_HUMAN-EJTSDPSLVIAFGR&1707.831574	0.95823	1	0.985341	1	0.985327	0.983147	1	0.96624
sp|P00450|CERU_HUMAN-ELHHLQEQJVSNAFLDK&2224.076054	0.938022	0.951315	0.775629	0.901554	0.859265	0.839076	0.80035	0.804538
sp|P00450|CERU_HUMAN-ELHHLQEQJVSNAFLDKGEFYIGSK&3105.504364	-1	-1	-1	-1	1	1	0.867905	1
sp|Q15904|VAS1_HUMAN-ELKLJASLPALLLIR&1866.119024	-1	1	1	1	-1	-1	1	-1
sp|P14384|CBPM_HUMAN-ELLLHLIDYLVTSDGKDPEITNLIJSTR&3384.766454	-1	-1	-1	-1	1	1	1	1
sp|Q8N8Z6|DCBD1_HUMAN-ELLLJTSEVTVR&1575.835594	1	1	1	1	1	1	1	1
sp|Q8N3J6|CADM2_HUMAN-ELNILFLJK&1305.718044	1	1	1	1	1	1	1	1
sp|Q8WWZ8|OIT3_HUMAN-ELVGGLELFLTJTSCR&2010.993234	1	1	1	1	0.707666	1	0.63451	1
sp|Q8IUK5|PLDX1_HUMAN-ELWVDVAEAJR&1503.720564	1	1	1	1	1	1	1	1
sp|P43121|MUC18_HUMAN-ENMVLJLSCEASGHPR&2015.904104	0.2312	0.0993001	0.226597	0.225124	0.905501	0.651154	0.549466	0.513607
sp|P12109|CO6A1_HUMAN-ENYAELLEDAFLKJVTAQICIDK&2899.416124	1	-1	-1	-1	1	1	1	1
sp|P12109|CO6A1_HUMAN-ENYAELLEDAFLKJVTAQICIDKK&3027.511084	0	1	-1	1	1	1	1	1
sp|Q08380|LG3BP_HUMAN-EPGSJVTMSVDAECVPMVR&2280.007244	0.916995	0.692251	0.837483	0.917771	1	1	1	1
sp|P55291|CAD15_HUMAN-EQPLJVTVCR&1417.687154	0.987625	0	1	0.670164	1	0.804344	0.831162	1
sp|O60568|PLOD3_HUMAN-EQYIHEJYSR&1540.679414	0.115149	0	1	1	0	0.0831828	0	1
sp|P40189|IL6RB_HUMAN-EQYTIIJR&1238.614304	0.516436	0.548821	0.55122	0.588441	0.77816	0.506006	0.745248	0.578065
sp|P23471|PTPRZ_HUMAN-ESFLQTJYTEIR&1702.805014	0.861506	1	0.975988	0.922002	0.87433	0.935369	0.742373	0.827069
sp|Q15223|PVRL1_HUMAN-ESQLJLTVMAK&1435.722874	1	1	1	1	1	1	1	1
sp|Q9NY97|B3GN2_HUMAN-ESWGQESNAGJQTVVR&1963.887194	1	1	1	1	1	0.776539	0.821067	1
sp|P40189|IL6RB_HUMAN-ETHLETJFTLK&1534.751534	0.987847	0.934137	0.905423	0.937502	0.902475	0.883283	0.928392	0.92422
sp|P55285|CADH6_HUMAN-ETLLWHJITVIATEINNPK&2408.258774	1	1	1	1	1	1	1	1
sp|Q9UN70|PCDGK_HUMAN-ETVPEYJLSITAR&1694.836314	1	1	1	1	1	1	1	1
sp|Q6UXZ4|UNC5D_HUMAN-EVFIJVTR&1179.613584	0.516652	0.452359	0.401212	0	1	1	1	1
sp|Q8IZF2|AGRF5_HUMAN-EVLSSJVSWR&1378.672884	1	1	1	1	1	1	1	1
sp|P33151|CADH5_HUMAN-EVYPWYJLTVEAK&1813.877444	1	1	1	1	1	1	1	1
sp|O75882|ATRN_HUMAN-EWLPLJR&1129.576804	0.994574	0.99468	0.992211	1	0.992493	1	1	0.997247
sp|O43561|LAT_HUMAN-EYVJVSQELHPGAAK&1843.895224	1	1	1	1	1	1	1	1
sp|P07911|UROM_HUMAN-FALLMTNCYATPSSJATDPLK&2533.171654	0.976317	1	1	0.973876	1	1	1	0.992952
sp|Q9Y6R7|FCGBP_HUMAN-FDFQGTCEYLLSAPCHGPPLGAEJFTVTVANEHR&4036.836014	0	-1	-1	-1	1	1	1	1
sp|O60494|CUBN_HUMAN-FDIEVTPJCTSNYLELR&2273.052194	0.948981	1	0.594921	1	0.916431	0.960989	0.897562	0.952095
sp|P32004|L1CAM_HUMAN-FFPYAJGTLGIR&1557.782764	0.891648	0.902954	0.929956	1	0.79244	0.863172	0.861534	0.895993
sp|P25311|ZA2G_HUMAN-FGCEIENJR&1340.566704	0.918379	0.953462	0.846185	0.841135	0.973067	0.991466	0.959198	0.920074
sp|Q9HC84|MUC5B_HUMAN-FGJLSLYLDNHYCTASATAAAAR&2689.244244	-1	1	1	1	-1	1	-1	-1
sp|Q8NAU1|FNDC5_HUMAN-FIQEVJTTTR&1410.699104	0.43278	0.577227	1	1	0.910628	0.279665	0.588941	0.163366
sp|P43251|BTD_HUMAN-FJDTEVLQR&1323.630694	0.223188	0.137166	0.153552	0.158321	0.363589	0.288807	0.243435	0.348079
sp|P55083|MFAP4_HUMAN-FJGSVSFFR&1262.593184	0.966952	0.88659	0.983894	0.964096	1	0.98154	1	1
sp|Q9H8L6|MMRN2_HUMAN-FJTTYINIGSSYFPEHGYFR&2615.196874	1	0.999009	1	1	1	0.998792	1	1
sp|Q9BVT8|TMUB1_HUMAN-FLJDSEQVAR&1380.652154	1	1	1	1	1	1	1	1
sp|P29622|KAIN_HUMAN-FLJDTMAVYEAK&1603.743994	0.948742	1	0.953044	0.951834	0.95884	0.919151	0.94557	0.924208
sp|P15309|PPAP_HUMAN-FLJESYK&1102.518274	0.915743	0.91938	0.844355	0.932922	1	0.981337	1	0.981399
sp|P15309|PPAP_HUMAN-FLJESYKHEQVYIR&2027.995264	1	0.95864	0.938816	0.969783	1	1	0.966957	0
sp|P05156|CFAI_HUMAN-FLNJGTCTAEGK&1513.671904	0.638963	0.73417	0.537773	0.678922	-1	1	-1	1
sp|O14773|TPP1_HUMAN-FLSSSPHLPPSSYFJASGR&2253.070234	1	0.891044	0.879325	0.798431	0.787454	0.799569	0.911476	0.892631
sp|Q9UNW1|MINP1_HUMAN-FLTEVEKJATALYHVEAFK&2412.221314	0	0	1	1	0.46622	0.516818	0.674275	0.403235
sp|Q6PK18|OGFD3_HUMAN-FMFMEEGAJK&1405.589424	-1	0.876761	0.816177	0.933374	0.936882	0.850701	0.86418	0.89559
sp|Q13201|MMRN1_HUMAN-FNPGAESVVLSJSTLK&1864.941854	0.97835	0.978443	0.980099	0.979972	0.984757	0.985554	0.986466	0.989373
sp|O95998|I18BP_HUMAN-FPJFSILYWLGJGSFIEHLPGR&2766.380614	-1	-1	1	-1	-1	-1	-1	-1
sp|O14498|ISLR_HUMAN-FQAFAJGSLLIPDFGK&1926.972764	0.77746	0.824591	0.781564	0.829566	0.812904	0.767473	0.88755	0.806962
sp|Q9BY67|CADM1_HUMAN-FQLLJFSSSELK&1614.814134	0.952944	0.957542	0.928545	0.941972	0.943388	0.917606	0.942207	0.943361
sp|O75309|CAD16_HUMAN-FSLVJDSEGWLCIEK&1998.924484	1	1	1	1	1	1	1	1
sp|P01033|TIMP1_HUMAN-FVGTPEVJQTTLYQR&1954.963644	1	0.988944	1	1	0.981437	0.976748	0.995297	1
sp|Q8NBK3|SUMF1_HUMAN-FVJSTGYLTEAEK&1660.783214	0	0.289471	0.381097	0.293984	0.339294	0.31741	0.533351	0.218609
sp|P20160|CAP7_HUMAN-FVJVTVTPEDQCRPNJVCTGVLTR&2978.422634	1	-1	1	1	-1	1	-1	1
sp|O00337|S28A1_HUMAN-FYJHTICAQ&1355.581624	0.99069	1	1	1	1	1	1	1
sp|Q7Z3B1|NEGR1_HUMAN-GAWLJR&918.455964	0.649555	0.682083	0.630939	0.663969	-1	1	-1	1
sp|Q6W4X9|MUC6_HUMAN-GCMAJVTVTR&1310.595904	1	1	1	1	-1	1	1	1
sp|Q8TDL5|BPIB1_HUMAN-GDQLILNLNJISSDR&1873.938164	1	1	1	1	1	1	1	1
sp|Q8IW52|SLIK4_HUMAN-GDVFHJLTNLR&1487.736884	1	1	1	1	1	1	1	1
sp|P32004|L1CAM_HUMAN-GEGJETTNMVITWKPLR&2148.052154	-1	1	1	1	0.955679	1	1	1
sp|P04156|PRIO_HUMAN-GEJFTETDVK&1341.593634	1	1	1	1	-1	1	1	1
sp|Q7Z4F1|LRP10_HUMAN-GFJATYHVR&1266.599324	1	0.959742	1	0.857104	0	1	0	0.876336
sp|P07204|TRBM_HUMAN-GFQWVTGDJJTSYSR&1933.844254	0.998603	0.997628	1	1	1	1	1	1
sp|Q13332|PTPRS_HUMAN-GHPQILEAAGJASAGTVLLR&2177.144074	1	-1	1	1	1	1	1	-1
sp|P11279|LAMP1_HUMAN-GHTLTLJFTR&1361.693964	0.0148639	0.0176008	0.0111333	0.0261429	0.0107736	0.0256901	0.0177728	0.0144269
sp|O75882|ATRN_HUMAN-GICJSSDVR&1209.529594	0.982995	0.994113	1	0.992573	-1	-1	-1	-1
sp|O00144|FZD9_HUMAN-GIGYJLTR&1095.556064	1	1	1	1	-1	1	1	0.603142
sp|Q86VB7|C163A_HUMAN-GJESALWDCK&1381.582024	1	0.941971	0.65796	0.911011	0.907576	0.903098	0.79736	0.92121
sp|Q8NFZ8|CADM4_HUMAN-GJESLPER&1103.509514	0.952152	0.924986	0.865752	0.929237	-1	-1	-1	-1
sp|P16870|CBPE_HUMAN-GJETIVNLIHSTR&1655.847894	-1	0.0313894	0.0393479	0.0567638	0.0506019	0.0536253	0.0680783	0.103694
sp|P13598|ICAM2_HUMAN-GJETLHYETFGK&1597.726034	0.976291	1	1	0.959101	0.45857	0.640024	0.716009	0.51057
sp|Q92896|GSLG1_HUMAN-GJITEYQCHQYITK&1956.888754	1	1	1	1	1	0.99045	1	1
sp|Q08334|I10R2_HUMAN-GJLTFTAQYLSYR&1735.841724	1	0.904238	0.323765	1	0.636523	-1	-1	-1
sp|O60883|ETBR2_HUMAN-GJLTGAPGQR&1172.578594	0.984521	1	1	1	-1	-1	-1	-1
sp|P48551|INAR2_HUMAN-GJMSGJFTYIIDK&1661.760714	1	0.956038	0.944184	0.946594	0.929245	0.775254	0.910176	0.860439
sp|P16109|LYAM3_HUMAN-GJMTCLHSAK&1320.580244	1	1	-1	1	-1	-1	-1	-1
sp|Q15043|S39AE_HUMAN-GJVTQHVQGHR&1434.696424	1	0.882877	0.893522	0.921476	-1	-1	-1	-1
sp|Q12860|CNTN1_HUMAN-GKAJSTGTLVITDPTR&1832.948004	1	1	1	1	1	1	1	1
sp|P17936|IBP3_HUMAN-GLCVJASAVSR&1335.645294	1	1	1	0.99284	1	1	1	1
sp|Q08380|LG3BP_HUMAN-GLJLTEDTYKPR&1608.799534	0.981852	0.947183	0.98992	0.988997	0.986879	0.960342	0.993544	1
sp|P0C0L4|CO4A_HUMAN/sp|P0C0L5|CO4B_HUMAN-GLJVTLSSTGR&1306.672884	0.464444	0.496797	0.396533	0.632363	0.645751	0.464085	0.482438	0.676853
sp|O95460|MATN4_HUMAN-GLNVGPJATR&1200.609894	1	1	1	1	-1	-1	-1	-1
sp|O00241|SIRB1_HUMAN-GLQLTWLENGJVSR&1788.900654	1	1	1	1	0.994875	1	0.996292	1
sp|P01833|PIGR_HUMAN-GLSFDVSLEVSQGPGLLJDTK&2378.185334	1	1	1	1	0.984938	1	1	0.989373
sp|P01871|IGHM_HUMAN-GLTFQQJASSMCVPDQDTAIR&2541.147584	1	1	1	1	1	-1	1	1
sp|P22105|TENX_HUMAN-GPJLTSPASITFTTGLEAPR&2232.127424	1	1	1	1	1	1	1	1
sp|P13611|CSPG2_HUMAN-GQFESVAPSQJFSDSSESDTHPFVIAK&3113.410194	1	1	1	1	1	1	1	1
sp|P25940|CO5A3_HUMAN-GQPAJQSVLLSIYDER&1991.980024	1	1	1	1	1	1	1	1
sp|P09564|CD7_HUMAN-GRIDFSGSQDJLTITMHR&2250.069924	0.364527	0.868146	0.915752	1	-1	-1	-1	-1
sp|Q8TBP5|F174A_HUMAN-GSEGGJGSNPVAGLETDDHGGK&2256.973104	1	1	1	1	0.980864	1	0.987812	1
sp|P24530|EDNRB_HUMAN-GSJASLAR&977.477814	1	1	1	1	-1	-1	-1	-1
sp|Q12841|FSTL1_HUMAN-GSJYSEILDK&1327.614364	1	1	1	1	1	0.982457	0.996989	1
sp|P13598|ICAM2_HUMAN-GSLEVJCSTTCNQPEVGGLETSLDK&2897.290674	0.892492	1	0.865218	1	0.896785	0.881726	0.889613	0.889
sp|Q96AP7|ESAM_HUMAN-GSLSLTJLSSSMAGVYVCK&2176.039184	1	1	1	1	1	0.983685	1	0.996663
sp|P07339|CATD_HUMAN-GSLSYLJVTR&1311.667064	0.0641526	0.219588	0.313944	0.895238	0.0865525	0.0720629	0.113032	0.0745244
sp|O95196|CSPG5_HUMAN-GSPAWEPPAJDTR&1599.716544	0.715688	0.263889	0.464454	0.295694	0.404948	0.475955	0.229704	0.698249
sp|Q9BRK3|MXRA8_HUMAN-GSPGJGSSHSGAPGPDPTLAR&2120.972324	1	1	1	1	1	1	1	1
sp|P08174|DAF_HUMAN-GSQWSDIEEFCJR&1829.752664	0.613785	0.467351	0.442595	0.536818	0.562282	0.501544	0.537984	0.512064
sp|Q7KYR7|BT2A1_HUMAN-GSVALVIHJITAQEJGTYR&2245.133904	0.45258	0.46988	0.462959	0.966543	0.939088	0.611124	0.795957	0.595728
sp|O00241|SIRB1_HUMAN/sp|Q9P1W8|SIRPG_HUMAN-GTAJLSEAIR&1233.620124	0.976589	0.9716	0.96644	0.977192	1	1	1	1
sp|P78324|SHPS1_HUMAN/sp|Q5TFQ8|SIRBL_HUMAN-GTAJLSETIR&1263.630694	0.972581	0.982868	0.956065	0.974282	1	0.992443	1	0.984507
sp|Q13449|LSAMP_HUMAN-GTDJITVR&1077.530244	1	1	1	1	-1	-1	-1	-1
sp|Q12860|CNTN1_HUMAN-GTEWLVJSSR&1350.641584	0.676303	0.689176	0.7105	0.820568	0.846376	0.865843	0.839345	0.856916
sp|P54753|EPHB3_HUMAN-GVISNVJETSLILEWSEPR&2345.175104	1	1	0.950434	1	1	1	1	1
sp|Q8IWA5|CTL2_HUMAN-GVLMVGJETTYEDGHGSR&2123.942984	1	1	1	1	1	1	1	1
sp|P08887|IL6RA_HUMAN-GVLTSLPGDSVTLTCPGVEPEDJATVHWVLR&3521.734844	1	1	1	1	1	1	1	1
sp|Q8NDA2|HMCN2_HUMAN-GVPTPJITWFK&1461.750414	1	0.957506	1	1	1	1	1	1
sp|P15328|FOLR1_HUMAN-GWJWTSGFJK&1398.620464	1	1	1	1	0.989123	0.992908	0.974651	0.986671
sp|Q01974|ROR2_HUMAN-GYFLNFLEPVNJITIVQGQTAILHCK&3191.632544	-1	-1	-1	-1	1	1	-1	1
sp|Q15485|FCN2_HUMAN-GYJYSYK&1096.471314	1	1	1	1	-1	-1	-1	-1
sp|Q7Z7M0|MEGF8_HUMAN-GYQGDGISHCJR&1565.652884	1	1	0.955614	0.940482	-1	-1	0	-1
sp|P04222|1C03_HUMAN/sp|P30685|1B35_HUMAN/sp|Q07000|1C15_HUMAN-GYYJQSEAGSHIIQR&1924.891534	-1	-1	1	1	1	-1	-1	-1
sp|Q6UWL2|SUSD1_HUMAN-HAILVGJHSSR&1392.711004	1	1	1	1	-1	-1	-1	-1
sp|P02751|FINC_HUMAN-HEEGHMLJCTCFGQGR&2134.861914	1	1	1	0.97686	0.942363	0.951639	0.950317	0.974672
sp|P04216|THY1_HUMAN-HEJTSSSPIQYEFSLTR&2198.012774	1	1	1	1	1	1	1	0.981273
sp|P11717|MPRI_HUMAN-HGNLYDLKPLGLJDTIVSAGEYTYYFR&3321.619374	-1	-1	-1	-1	-1	1	0	-1
sp|P98172|EFNB1_HUMAN-HHDYYITSTSJGSLEGLENR&2495.120084	0.964355	0.924396	0.936424	0.991181	1	1	0.994748	0.995264
sp|P11362|FGFR1_HUMAN-HIEVJGSK&1085.535334	1	1	1	1	-1	-1	-1	-1
sp|Q24JP5|T132A_HUMAN-HJFTASLLTLR&1474.778024	1	-1	1	1	1	1	-1	1
sp|P10909|CLUS_HUMAN-HJSTGCLR&1146.508794	0.76846	0.748732	0.760461	0.76008	0.846509	0.830568	0.871274	0.871528
sp|Q8NFQ8|TOIP2_HUMAN-HLJASNPTEPATIIFTAAR&2226.128094	1	1	1	1	0.437571	0.483084	1	0.330355
sp|Q16620|NTRK2_HUMAN-HMJETSHTQGSLR&1699.758424	0.905905	0.79671	0.759952	0.822337	-1	-1	-1	-1
sp|Q6FHJ7|SFRP4_HUMAN-HMPWJITR&1256.597224	0.847283	0.846891	0.870471	0.864005	0.851672	0.875219	0.870864	0.877883
sp|Q16849|PTPRN_HUMAN-HNEQJLSLADVTQQAGLVK&2267.139384	1	1	1	1	1	1	1	1
sp|Q86VB7|C163A_HUMAN-HSJCTHQQDAGVTCSDGSNLEMR&2806.134124	0.810922	0.835688	0.776858	0.832869	1	1	1	0.852493
sp|Q9H6B4|CLMP_HUMAN-HVYNJLTEEQK&1576.736934	0.962364	0.869779	0.966279	0.937673	1	1	1	1
sp|A6NGN9|IGLO5_HUMAN-HYGJYTCR&1272.519344	1	0.610567	0.470064	0.0772172	-1	-1	-1	-1
sp|P13598|ICAM2_HUMAN-HYLVSJISHDTVLQCHFTCSGK&2805.285064	-1	-1	-1	1	1	1	1	1
sp|O43155|FLRT2_HUMAN-IAVISDMAFQJLTSLER&2110.061654	1	1	1	1	1	1	1	1
sp|P09564|CD7_HUMAN-IDFSGSQDJLTITMHR&2036.947354	0.938415	0.923336	0.901001	0.91416	0.928437	0.903891	0.948113	0.919308
sp|Q96J84|KIRR1_HUMAN-IDGGPVILLQAGTPHJLTCR&2334.200214	0.998085	0.992607	0.991505	1	1	1	0.994106	1
sp|P55285|CADH6_HUMAN-IFNIDSGJGSIFTSK&1801.873434	0.994638	1	1	1	1	0.98153	1	1
sp|P04275|VWF_HUMAN-IGEADFJR&1123.514594	1	0.402384	1	0.397627	1	1	1	0.720876
sp|P78324|SHPS1_HUMAN-IGJITPADAGTYYCVK&1944.913904	1	1	1	1	-1	-1	-1	-1
sp|O14786|NRP1_HUMAN-IGYSNJGSDWK&1442.631404	0.792926	0	0.331693	0.90153	0.589403	0.515459	0.73197	0.346033
sp|Q12913|PTPRJ_HUMAN-IHVAGETDSSNLJVSEPR&2127.008034	1	0.539165	1	1	0.323519	0.190009	0.706576	0.290519
sp|P01833|PIGR_HUMAN-IIEGEPNLKVPGJVTAVLGETLK&2593.421484	1	1	1	1	1	1	1	1
sp|O00533|NCHL1_HUMAN-IIPSJNSGTFR&1407.699434	1	0.990632	1	1	1	1	1	1
sp|P17342|ANPRC_HUMAN-IIQQTWJR&1260.646284	1	1	1	1	1	1	1	1
sp|P01133|EGF_HUMAN-IITKEJISQPR&1500.814804	1	1	1	1	1	1	1	1
sp|Q9NRA1|PDGFC_HUMAN-IITVSTJGSIHSPR&1683.879194	1	1	1	1	1	1	1	1
sp|P01591|IGJ_HUMAN-IIVPLNNREJISDPTSPLR&2350.249264	1	1	0.997365	1	1	1	1	1
sp|Q14126|DSG2_HUMAN-IJATDADEPNTLNSK&1804.832694	0.81229	1	1	1	1	0.991153	0.992288	1
sp|Q6V0I7|FAT4_HUMAN-IJATTGEIFNK&1409.703854	1	1	1	1	1	1	1	1
sp|Q9Y561|LRP12_HUMAN-IJCSWFIR&1297.612534	1	1	1	1	1	1	1	1
sp|Q9H6X2|ANTR1_HUMAN-IJDSVTLNEKPFSVEDTYLLCPAPILK&3278.663234	1	1	1	1	1	1	1	1
sp|Q9HAT2|SIAE_HUMAN-IJFTLR&965.518224	0.364417	0.846103	0.405599	0.394391	0.437279	0.386892	0.38974	0.348665
sp|P27930|IL1R2_HUMAN-IJLTWHK&1113.581884	1	1	1	1	1	1	1	1
sp|Q9NU53|GINM1_HUMAN-IJVTTLK&990.559754	0.869937	0.599917	0.545041	0.693143	-1	1	-1	1
sp|Q9NU53|GINM1_HUMAN-IJVTTLKDDGDISK&1720.873104	0.844011	0.548884	0.539332	0.595679	0.570856	0.50227	0.535512	0.548569
sp|Q9UBV2|SE1L1_HUMAN-ILJGSNKK&1075.587364	0.99651	1	1	1	-1	1	-1	1
sp|Q86UX2|ITIH5_HUMAN-ILJNTR&932.492744	0.844794	1	0.834129	1	-1	-1	-1	-1
sp|O95841|ANGL1_HUMAN-ILJVTTEMLK&1363.726894	0.875396	-1	0.786799	1	0.900708	0.802369	1	1
sp|P35613|BASI_HUMAN-ILLTCSLJDSATEVTGHR&2189.063434	1	1	0.996801	1	1	1	1	1
sp|Q86SQ4|GP126_HUMAN-ILSJLSCNVK&1349.686094	1	1	1	1	1	1	1	1
sp|P53634|CATC_HUMAN-ILTJNSQTPILSPQEVVSCSQYAQGCEGGFPYLIAGK&4229.029684	0.15099	0.248491	0.146426	0.771397	0.441704	0.471198	0.199966	0.371778
sp|P04745|AMY1_HUMAN/sp|P04746|AMYP_HUMAN/sp|P19961|AMY2B_HUMAN-INGJCTGIK&1178.560164	0.819382	0.161539	0.359485	0.196994	-1	-1	-1	-1
sp|Q96EK5|KBP_HUMAN-INNLJK&917.481844	1	1	1	1	-1	-1	-1	-1
sp|P27487|DPP4_HUMAN-IPJNTQWVTWSPVGHK&2066.022174	1	0.972166	0.969327	1	1	1	1	1
sp|Q8WZ75|ROBO4_HUMAN-IQLEJVTLLNPDPAEGPK&2150.110714	1	1	1	1	1	1	1	1
sp|Q8WZ75|ROBO4_HUMAN-IQLEJVTLLNPDPAEGPKPR&2403.264584	0.998333	0.997856	0.997929	1	0.998287	0.998002	0.998799	1
sp|P54289|CA2D1_HUMAN-ISDJNTEFLLNFNEFIDR&2403.123064	1	1	1	1	1	1	1	1
sp|O00533|NCHL1_HUMAN-ISGVJLTQK&1161.624144	0.99272	1	0.997946	0.951681	-1	-1	-1	1
sp|Q5TFQ8|SIRBL_HUMAN-ISJITPADAGTYYCVK&1974.924464	1	1	1	1	1	1	1	1
sp|Q9ULV1|FZD4_HUMAN-ISMCQNLGYJVTK&1729.801524	0.982463	0.97713	0.977593	0.98396	0.991154	0.984554	0.992905	0.991104
sp|O94813|SLIT2_HUMAN-ITCVGJDSFIGLSSVR&1926.935714	1	1	1	1	1	1	1	1
sp|Q6UX71|PXDC2_HUMAN-ITJISAVEMTPLPTCLQFJR&2507.240024	1	0.748809	1	1	1	1	1	1
sp|Q16620|NTRK2_HUMAN-ITJISSDDSGK&1338.615094	1	1	1	1	-1	-1	-1	-1
sp|P01042|KNG1_HUMAN-ITYSIVQTJCSK&1615.776354	0.945169	0.96551	0.942341	1	0.967776	0.9601	0.955606	0.973857
sp|Q9HC56|PCDH9_HUMAN-IVASDSGKPSLJQTALVR&2058.095724	1	1	1	1	1	1	1	1
sp|Q6UXD5|SE6L2_HUMAN-IVSPEPGGAVGPJLTCR&1925.951704	1	1	1	1	1	1	1	1
sp|Q9Y646|CBPQ_HUMAN-IVVYNQPYIJYSR&1830.915214	0.21032	0.445225	0.438729	0.523223	0.358685	0.314366	0.541734	0.358294
sp|Q9BX67|JAM3_HUMAN-IWJVTR&990.513474	1	0.993451	1	1	0.733244	1	0.792694	1
sp|P15328|FOLR1_HUMAN-JACCSTJTSQEAHK&1809.725804	1	0.992328	0.978854	0.990704	1	1	1	1
sp|P15328|FOLR1_HUMAN-JACCSTJTSQEAHKDVSYLYR&2706.165004	1	1	0.982954	0.9947	0.866418	0.992918	0.910626	1
sp|Q8NC42|RN149_HUMAN-JASAVVLYNEER&1566.752584	1	1	1	1	1	1	1	1
sp|Q13477|MADCA_HUMAN-JASLSAAGTR&1149.562614	1	0.998405	1	1	-1	-1	-1	-1
sp|Q96F05|CK024_HUMAN-JASVETVDJK&1278.593974	1	1	1	1	-1	-1	-1	-1
sp|Q9Y4L1|HYOU1_HUMAN-JATLAEQAK&1147.572114	0.961753	1	1	1	-1	-1	-1	-1
sp|Q13740|CD166_HUMAN-JATVVWMK&1150.569274	1	1	1	1	1	1	1	1
sp|Q9UBG0|MRC2_HUMAN-JCTSFR&986.412774	1	1	1	1	-1	-1	-1	-1
sp|P07911|UROM_HUMAN-JETHATYSNTLYLADEIIIR&2539.244224	0.855072	0.860876	0.888572	0.914772	0.891817	0.853919	0.859512	0.824555
sp|Q7Z7G0|TARSH_HUMAN-JETLALPAESK&1374.687874	1	1	1	1	1	1	1	1
sp|P13598|ICAM2_HUMAN-JFSCLAVLDLMSR&1727.822264	0.951445	1	1	1	1	1	1	1
sp|Q9BQ51|PD1L2_HUMAN-JFSCVFWNTHVR&1768.799164	1	-1	1	1	1	1	1	1
sp|P12109|CO6A1_HUMAN-JFTAADWGQSR&1454.642654	0.919274	0.854273	0.885401	0.923505	0.902596	0.907033	0.94492	0.921422
sp|O00391|QSOX1_HUMAN-JGSGAVFPVAGADVQTLR&1960.985454	0.954954	0.985529	0.954531	0.971305	0.966624	0.950828	0.97091	0.962062
sp|P30530|UFO_HUMAN-JGSQAFVHWQEPR&1757.812174	0.997819	1	1	0.979945	1	1	1	1
sp|P11717|MPRI_HUMAN-JGSSIVDLSPLIHR&1709.894844	-1	0.9149	0.912561	1	0.891798	0.899291	0.93657	0.94127
sp|Q6V0I7|FAT4_HUMAN-JGTATVLSVDR&1334.667804	1	1	1	1	0.70357	1	0.193002	0.254295
sp|P05156|CFAI_HUMAN-JGTAVCATNR&1265.567044	0.830743	0.909885	0.807215	0.857129	-1	-1	-1	-1
sp|Q8TB96|TIP_HUMAN-JHSALITSVVPGDYDGDSQMDVLLTYLPK&3350.622814	1	1	1	-1	1	1	1	0.817787
sp|O75882|ATRN_HUMAN-JHSCSEGQISIFR&1736.778824	1	1	1	1	0.997497	0.995862	1	0.998468
sp|Q9UBX5|FBLN5_HUMAN-JHTCNLQQTCYNLQGGFK&2385.047794	0.960911	0.957495	1	1	1	1	1	1
sp|Q8IZP9|GPR64_HUMAN-JICJLSSICJDSAFFR&2119.930314	1	1	1	1	1	1	1	1
sp|P04004|VTNC_HUMAN-JISDGFDGIPDNVDAALALPAHSYSGR&2974.394484	0.407608	0.31971	0.170211	0.160812	0.494294	0.310758	0.361852	0.271458
sp|Q6UWI2|PARM1_HUMAN-JISIESR&1020.508784	0.996344	0.995981	1	0.997769	1	-1	1	1
sp|P55290|CAD13_HUMAN-JITAVGK&904.486594	0.884268	0.922774	0.937427	0.923019	-1	-1	-1	1
sp|Q8IWA5|CTL2_HUMAN-JITDLVEGAK&1261.640194	1	1	1	1	1	1	1	1
sp|P41271|NBL1_HUMAN-JITQIVGHSGCEAK&1715.814874	0.99775	0.997488	0.801138	0.950963	1	0.985345	0.995016	0.994588
sp|Q16288|NTRK3_HUMAN-JITSIHIENWR&1584.789654	-1	1	1	1	1	1	1	1
sp|P20138|CD33_HUMAN-JJCSLSIVDAR&1450.672234	0.67449	0.69613	0.591901	0.821378	1	0.707692	0.800572	0.751441
sp|P40189|IL6RB_HUMAN-JLSCIVNEGK&1335.634054	0.989263	0.988452	0.978311	1	0.979204	0.963933	0.920749	0.96344
sp|P40189|IL6RB_HUMAN-JLSCIVNEGKK&1463.729014	1	1	1	1	-1	1	-1	1
sp|P21709|EPHA1_HUMAN-JLSFSASGTQLSLR&1682.847554	0.979583	0.972411	1	1	0.739792	0.566738	0.477882	0.41959
sp|Q9HAT2|SIAE_HUMAN-JLTFEGPLPEK&1446.724254	0.867354	0.852199	0.84687	0.816286	0.896057	0.875725	0.880172	0.88889
sp|P61106|RAB14_HUMAN-JLTNPNTVIILIGNK&1826.014954	1	1	1	1	1	1	1	1
sp|P98164|LRP2_HUMAN-JLTNPR&916.461434	0.328402	0.433745	0.373741	0.563353	-1	-1	-1	-1
sp|P24821|TENA_HUMAN-JLTVPGSLR&1158.624484	1	1	1	1	1	1	1	1
sp|Q8IYS5|OSCAR_HUMAN-JMSFVLYR&1231.590734	0.990458	0.985394	0.98026	0.991903	0.987397	0.986282	0.985314	0.983346
sp|Q6UX06|OLFM4_HUMAN-JMTLLVEK&1149.595154	1	0.981435	0.984753	0.9858	1	0.992111	1	0.99473
sp|Q9UEF7|KLOT_HUMAN-JMTYSAGHNLLK&1550.739914	1	1	1	1	1	0.973721	1	0.981084
sp|P01871|IGHM_HUMAN-JNSDISSTR&1195.531704	0.883677	1	1	1	-1	-1	-1	-1
sp|Q9NZV1|CRIM1_HUMAN-JNSVPJYCK&1297.560884	1	1	1	1	0	0	0	0
sp|P10253|LYAG_HUMAN-JNTIVNELVR&1373.715084	0.620809	0.78279	0.790508	0.817261	0.839382	0.82098	0.896297	0.867217
sp|P15144|AMPN_HUMAN-JNTNNWR&1120.489774	0.934361	0.97167	1	1	-1	-1	-1	-1
sp|P13688|CEAM1_HUMAN-JQSLPSSER&1219.568084	1	1	0	0.677302	-1	-1	-1	-1
sp|Q9NZP8|C1RL_HUMAN-JQSVNVFLGHTAIDEMLK&2218.094014	1	0.842273	0.879224	1	0.799659	0.683025	0.810108	0.705059
sp|O60637|TSN3_HUMAN-JQSVPLSCCR&1422.623174	0.645471	0.790037	0.710361	0.646639	1	0.849392	1	0.800071
sp|Q03405|UPAR_HUMAN-JQSYMVR&1099.496834	1	1	1	1	-1	-1	-1	-1
sp|Q13201|MMRN1_HUMAN-JQTLTSTEK&1223.588154	0.998574	1	1	1	-1	-1	-1	-1
sp|Q8NBJ4|GOLM1_HUMAN-JQTNLER&1076.509844	0.710155	0.753258	0.633079	0.753194	-1	-1	-1	-1
sp|Q9BX67|JAM3_HUMAN-JSSFHLNSETGTLVFTAVHK&2391.170684	0.973441	1	1	1	1	1	1	1
sp|Q9ULI3|HEG1_HUMAN-JSSGPDLSWLHFYR&1880.869344	0.998633	0.998649	0.998898	1	0.999193	0.99846	1	1
sp|O60609|GFRA3_HUMAN-JSSLIGCMCHR&1536.648344	1	1	1	1	1	1	1	1
sp|P14778|IL1R1_HUMAN-JSSYCLR&1101.476094	1	1	1	0.772316	-1	-1	-1	-1
sp|Q96F46|I17RA_HUMAN-JSTCLDDSWIHPR&1802.789384	-1	0.80294	0.88957	1	1	0.879355	0.94811	0.89241
sp|O00391|QSOX1_HUMAN-JSTLDPGKPEMMK&1649.764094	1	1	-1	1	0.99082	1	1	0.92312
sp|P19256|LFA3_HUMAN-JSTSIYFK&1161.555394	0.986382	0.981717	0.988822	1	0.744431	1	0.425535	0.991359
sp|P78552|I13R1_HUMAN-JTSPDTJYTLYYWHR&2132.943954	-1	0.937509	0.939508	1	1	0.935841	0.946297	1
sp|P24821|TENA_HUMAN-JTTSYVLR&1155.577184	1	1	1	1	-1	-1	-1	1
sp|Q8N271|PROM2_HUMAN-JVSECFLAR&1297.597274	1	1	1	1	1	1	1	1
sp|P11597|CETP_HUMAN-JVSEDLPLPTFSPTLLGDSR&2360.174764	1	0.232769	1	1	1	1	0.964921	1
sp|P12109|CO6A1_HUMAN-JVTAQICIDK&1363.665354	0.988369	1	1	1	0.980103	0.972781	0.971903	0.981821
sp|P12109|CO6A1_HUMAN-JVTAQICIDKK&1491.760324	1	1	-1	0.991267	1	0.955249	0.994155	0.97727
sp|O43451|MGA_HUMAN-JVTAYFPR&1169.571714	0.990779	0.986175	0.988586	1	0.923175	0.987519	1	0.985621
sp|Q02487|DSC2_HUMAN-JVTLHVPSK&1196.640134	0.770982	0.900456	0.857355	0.846979	-1	0.894122	1	0.941027
sp|P01215|GLHA_HUMAN-JVTSESTCCVAK&1557.665094	1	1	1	1	-1	0	-1	-1
sp|Q9GZX9|TWSG1_HUMAN-JYSDTPPTSK&1311.583064	0.989136	0.960121	0.98111	0.985609	-1	-1	-1	-1
sp|Q14515|SPRL1_HUMAN-JYSHHQLJR&1370.632754	0.718421	0.691336	0.672799	0.720461	0.757028	-1	1	-1
sp|P42785|PCP_HUMAN-JYSVLYFQQK&1491.724574	0.600092	1	1	1	0.756627	0.614294	0.711297	0.606879
sp|P10643|CO7_HUMAN-JYTLTGR&1026.498214	0.999404	1	1	1	-1	-1	-1	-1
sp|Q9UBR2|CATZ_HUMAN-JYTLWR&1054.508384	0.56392	0.785619	0.467085	0.597868	0.509356	0.41548	0.646439	0.412248
sp|P51654|GPC3_HUMAN-JYTNAMFK&1190.527794	1	1	1	1	1	0.939624	1	0.957895
sp|Q9Y5Y7|LYVE1_HUMAN-KANQQLJFTEAK&1593.799884	0.704671	0.695401	0.735235	0.678656	0	0.543597	-1	0.789752
sp|Q4LDE5|SVEP1_HUMAN-KCPLPEJITHILVHGDDFSVNR&2763.365044	-1	-1	1	1	1	1	1	1
sp|P10909|CLUS_HUMAN-KEDALJETR&1277.609954	0.96259	0.981608	0.963317	0.974085	-1	-1	-1	-1
sp|P15309|PPAP_HUMAN-KFLJESYK&1230.613234	0.793508	0.788849	0.777441	0.80849	-1	0.878613	-1	0.905939
sp|P15309|PPAP_HUMAN-KFLJESYKHEQVYIR&2156.090234	-1	0.72692	0.823718	0.754346	0.857338	0.846032	0.859421	1
sp|P98172|EFNB1_HUMAN-KHHDYYITSTSJGSLEGLENR&2623.215054	1	-1	-1	1	1	1	1	1
sp|P14151|LYAM1_HUMAN-KIGGIWTWVGTJK&1661.877734	1	1	1	1	-1	-1	1	-1
sp|Q9NPR2|SEM4B_HUMAN-KIJSSLQLPDR&1472.783504	1	1	1	1	1	1	1	1
sp|P15328|FOLR1_HUMAN-KJACCSTJTSQEAHKDVSYLYR&2834.259964	1	1	1	1	1	1	1	1
sp|Q9Y639|NPTN_HUMAN-KJASNMEYR&1314.587434	1	1	1	1	-1	-1	-1	-1
sp|Q8IWA5|CTL2_HUMAN-KJITDLVEGAK&1389.735154	0.777924	0.956491	1	1	1	1	1	1
sp|Q9NZP8|C1RL_HUMAN-KJQSVNVFLGHTAIDEMLK&2346.188974	1	-1	0.863508	0.935978	0.950759	0.82592	0.873806	0.92466
sp|P10909|CLUS_HUMAN-KKEDALJETR&1405.704914	0.870814	0.878841	0.823412	0.837067	0.889845	0.887812	0.901293	1
sp|Q9UBG0|MRC2_HUMAN-KKPJATAEPTPPDR&1723.874114	1	1	1	1	-1	-1	-1	-1
sp|P27487|DPP4_HUMAN-KLDFIILJETK&1535.844704	-1	-1	0.695552	0.961898	0.776932	0.674017	0.87267	0.832775
sp|P51884|LUM_HUMAN-KLHINHNJLTESVGPLPK&2213.180464	1	1	1	1	1	0.996927	0.994291	0.997318
sp|Q6UX06|OLFM4_HUMAN-KLLJLTVR&1158.697254	-1	0.870171	0.904745	0.873538	1	0.899208	0.903039	0.911851
sp|P02750|A2GL_HUMAN-KLPPGLLAJFTLLR&1755.029484	1	0.777373	0.313272	0.279828	0.443672	0.59819	0.283704	0.346297
sp|Q8NFT8|DNER_HUMAN-KPCQNJASCIDANEK&1950.841164	0.818826	1	1	1	-1	-1	-1	-1
sp|Q9BXP8|PAPP2_HUMAN-KPTPIPIPPMVIGQTJK&2033.123134	1	0.999496	1	1	1	1	1	0.999522
sp|Q9ULI3|HEG1_HUMAN-KRJSSGPDLSWLHFYR&2165.065424	-1	1	1	1	-1	-1	-1	-1
sp|Q13332|PTPRS_HUMAN-KVEAEALJATAIR&1587.846834	0.517298	0	0.418434	1	0.646759	0.546087	0.535221	0.902068
sp|Q13421|MSLN_HUMAN-KWJVTSLETLK&1520.808654	-1	1	1	1	1	1	1	1
sp|P01042|KNG1_HUMAN-KYNSQJQSNNQFVLYR&2205.045074	1	0.975617	0.971391	0.991327	1	0.987764	0.985621	1
sp|P01876|IGHA1_HUMAN-LAGKPTHVJVSVVMAEVDGTCY&2549.214194	0.600374	0.774946	0.522275	0.550616	0.504041	0.548533	0.793767	0.571535
sp|P10909|CLUS_HUMAN-LAJLTQGEDQYYLR&1885.905784	0.986402	0.984774	0.982476	0.989609	0.984094	0.984797	0.98279	1
sp|Q99523|SORT_HUMAN-LAJNTHQHVFDDLR&1881.896974	1	1	1	1	1	1	1	1
sp|O60494|CUBN_HUMAN-LCSSVJVSNEIK&1551.745064	0.97575	0.988694	0.981409	0.986896	0.958538	0.932656	0.916558	0.958457
sp|P08294|SODE_HUMAN-LDAFFALEGFPTEPJSSSR&2287.064484	1	1	1	1	1	0.990271	1	1
sp|P02751|FINC_HUMAN-LDAPTNLQFVJETDSTVLVR&2434.222784	0.975525	0.947445	1	0.969914	0.963518	0.935433	0.970471	0.975221
sp|Q9NQS3|PVRL3_HUMAN-LDGQWPDGLLASDNTLHFVHPLTFJYSGVYICK&3979.909104	1	1	-1	1	1	-1	1	1
sp|Q9NZU1|FLRT1_HUMAN-LDLSNNJLTTLPR&1672.863204	1	1	0.883415	1	1	0.911665	1	1
sp|P19801|AOC1_HUMAN-LEJITNPWSPR&1528.752204	0.423782	0.477683	0.329361	0.292132	0.51626	0.319263	0.416097	0.408909
sp|P69849|NOMO3_HUMAN/sp|Q15155|NOMO1_HUMAN/sp|Q5JPE7|NOMO2_HUMAN-LEJITTGTYTIHAQK&1891.952744	1	1	1	1	1	1	1	1
sp|P10253|LYAG_HUMAN-LEJLSSSEMGYTATLTR&2074.972884	0.0403639	0.168481	0.111713	0.132186	0.174436	0.136911	0.18931	0.169183
sp|Q6P9A2|GLT18_HUMAN-LEJSTAPIR&1202.614314	0.530767	0.604905	0.492066	0.562007	-1	-1	-1	-1
sp|Q96JQ0|PCD16_HUMAN-LETRPGPDGTPVPELVVTGELDREJR&3048.536404	1	1	1	1	-1	1	1	-1
sp|P03951|FA11_HUMAN-LETTVJYTDSQRPICLPSK&2424.184274	1	-1	0.970943	1	1	1	0.983362	1
sp|Q9HC56|PCDH9_HUMAN-LFALJJTTGLITVQR&1863.010214	1	0.599844	0.3655	0.685634	0.802608	1	0.700491	1
sp|O75144|ICOSL_HUMAN-LFJVTPQDEQK&1520.735884	0.822782	0.831148	0.764412	0.783368	0.830078	0.726369	0.827153	0.820912
sp|Q9UKJ1|PILRA_HUMAN-LFLJWTEGQK&1437.714024	1	1	1	1	1	1	1	1
sp|Q14118|DAG1_HUMAN-LGAJGSHIPQTSSVFSIEVYPEDHSELQSVR&3585.722354	1	1	1	1	1	1	1	1
sp|Q8N4F0|BPIB2_HUMAN-LGATPVAMLHTNJATLR&1982.025544	0.938835	0.97483	0.985945	0.984873	1	0.983137	0.960987	1
sp|P06280|AGAL_HUMAN-LGIYADVGJK&1251.634704	1	0.988141	1	1	1	1	1	0.992151
sp|P02749|APOH_HUMAN-LGJWSAMPSCK&1452.637764	-1	-1	0.769481	0.869403	-1	1	-1	0.985063
sp|Q6UVK1|CSPG4_HUMAN-LGLTPEATJASLLGCMEDLSVNGQR&2848.358304	1	1	1	1	1	0.968283	0.964053	1
sp|P51884|LUM_HUMAN-LGSFEGLVJLTFIHLQHNR&2397.244124	0	-1	-1	-1	1	1	1	1
sp|Q13449|LSAMP_HUMAN-LGVTJASLVLFR&1491.829724	0.547143	0.558559	0.63715	1	0.654059	0.485442	0.527565	0.665073
sp|Q6EMK4|VASN_HUMAN-LHEITJETFR&1461.710004	0.929975	0.899028	0.898539	0.917287	0.949017	0.906984	0.937511	0.934276
sp|P51884|LUM_HUMAN-LHINHNJLTESVGPLPK&2085.085494	1	1	1	0.996956	0.988466	0.988369	0.99105	0.991751
sp|Q14314|FGL2_HUMAN-LHVGNYJGTAGDALR&1759.848944	1	1	0.992223	1	0.99149	0.993317	0.995857	1
sp|P05156|CFAI_HUMAN-LISJCSK&1023.490684	0.456054	0.612548	0.424496	0.630395	-1	-1	-1	-1
sp|Q9Y5I2|PCDAA_HUMAN-LJASDSDEGINK&1464.658024	0.694508	1	0.540225	-1	-1	-1	-1	-1
sp|Q15904|VAS1_HUMAN-LJASLPALLLIR&1495.897404	1	1	1	1	1	1	1	1
sp|Q06418|TYRO3_HUMAN-LJCSVEGMEEPDIQWVK&2236.002814	0.894503	1	1	1	1	1	1	1
sp|Q6UX06|OLFM4_HUMAN-LJDTTLQVLNTWYTK&2012.010264	0.820867	0.855262	0.654953	0.800738	1	0.815557	0.679411	0.64234
sp|P54760|EPHB4_HUMAN-LJGSSLHLEWSAPLESGGR&2212.076054	0	0.935342	0.817143	1	0.803011	0.83346	0.93602	0.922127
sp|Q9ULI3|HEG1_HUMAN-LJJSTGLQSSSVSQTK&1852.901444	1	1	1	1	1	1	1	1
sp|Q8N271|PROM2_HUMAN-LJLSVR&903.502574	1	1	1	1	-1	-1	-1	1
sp|O95274|LYPD3_HUMAN-LJLTSR&905.481844	1	1	1	1	-1	-1	-1	-1
sp|O00754|MA2B1_HUMAN-LJQTEPVAGNYYPVNTR&2138.028024	1	1	1	1	1	1	-1	1
sp|Q68D85|NR3L1_HUMAN-LJSSQEDPGTVYQCVVR&2153.989934	1	1	1	1	1	1	1	1
sp|O15393|TMPS2_HUMAN-LJTSAGNVDIYK&1496.735874	1	0.935734	1	1	0.965062	0.945488	1	1
sp|O15393|TMPS2_HUMAN-LJTSAGNVDIYKK&1624.830834	1	0.915565	0.957948	1	1	1	1	1
sp|P52823|STC1_HUMAN-LJVCSIAK&1106.564184	1	0.929938	1	1	1	1	1	1
sp|Q6UXD5|SE6L2_HUMAN-LLAJSSMLGEGQVLR&1789.924424	1	1	1	1	1	1	1	1
sp|P40197|GPV_HUMAN-LLDLSGNJLTHLPK&1736.930894	0.620719	0.371769	0.409523	0.411269	0.302799	0.160306	0.207687	0.0946833
sp|Q9UN74|PCDA4_HUMAN-LLENVPJGTLVIK&1611.908364	1	1	1	1	1	1	1	1
sp|P24821|TENA_HUMAN-LLETVEYJISGAER&1795.883994	1	1	1	1	1	1	1	1
sp|Q9Y6R7|FCGBP_HUMAN-LLISSLSESPASVSILSQADJTSKK&2777.454624	-1	0.659704	0.806726	0.666575	-1	0.590996	0.49234	-1
sp|Q6UX06|OLFM4_HUMAN-LLJLTVR&1030.602294	1	1	1	1	1	1	1	1
sp|O75976|CBPD_HUMAN-LLJTTDVYLLPSLNPDGFER&2479.248254	-1	1	1	1	1	1	1	1
sp|P11279|LAMP1_HUMAN-LLNINPJK&1127.618664	0.674094	0.618739	0.675443	0.587772	1	0.750531	1	0.745572
sp|P21810|PGS1_HUMAN-LLQVVYLHSNJITK&1844.004384	0.287633	0.519049	0.267209	0.429928	0.43492	0.273355	0.567506	0.479716
sp|P01042|KNG1_HUMAN-LNAENJATFYFK&1633.762424	0.990011	0.994845	0.984181	0.990422	0.989209	0.99891	0.999402	0.997505
sp|Q92673|SORL_HUMAN-LNFGLGJR&1092.556404	1	1	1	0.936175	1	0.795915	1	0.839392
sp|Q8IZF2|AGRF5_HUMAN-LNLVPGEJITCQDPVIGVGEPGK&2608.305464	1	1	1	1	1	0.859223	1	0.875617
sp|P05362|ICAM1_HUMAN-LNPTVTYGJDSFSAK&1815.852694	0.938919	0.897151	0.841589	0.814969	0.828129	1	0.811172	0.874106
sp|Q6EMK4|VASN_HUMAN-LPASLAEYTVTQLRPJATYSVCVMPLGPGR&3463.747974	0.964622	0.948895	1	0.955964	0.949333	1	0.937776	1
sp|Q9NR99|MXRA5_HUMAN-LPFFTJK&1068.549194	1	-1	1	1	1	1	1	1
sp|Q92859|NEO1_HUMAN-LPSGMLVISJATEGDGGLYR&2252.099484	1	1	1	1	1	1	1	1
sp|Q96AP7|ESAM_HUMAN-LQGVPHVGAJVTLSCQSPR&2222.111394	1	1	1	1	1	1	1	1
sp|Q9BYF1|ACE2_HUMAN-LQLQALQQJGSSVLSEDK&2160.091034	1	1	1	1	1	1	1	1
sp|P78324|SHPS1_HUMAN/sp|Q5TFQ8|SIRBL_HUMAN-LQLTWLENGJVSR&1731.879194	1	1	1	1	1	1	1	1
sp|P31785|IL2RG_HUMAN-LQNLVIPWAPEJLTLHK&2188.189234	1	1	1	1	1	1	1	1
sp|Q8NBJ4|GOLM1_HUMAN-LQQDVLQFQKJQTNLER&2304.171024	-1	1	1	1	0.211729	1	1	1
sp|Q8IYS5|OSCAR_HUMAN-LRJMSFVLYR&1500.775904	-1	1	0.974152	1	0	0	0	0
sp|P05156|CFAI_HUMAN-LSDLSIJSTECLHVHCR&2243.031084	0.996398	0.696872	0.805517	0.958388	0.987901	0.976812	0.998612	1
sp|O95185|UNC5C_HUMAN/sp|Q8IZJ1|UNC5B_HUMAN-LSDTAJYTCVAK&1544.702854	0.974498	1	1	0.816181	1	0.935796	1	1
sp|P17181|INAR1_HUMAN-LSGCQJITSTK&1410.666084	0.912317	1	0.956946	1	-1	-1	-1	-1
sp|P01833|PIGR_HUMAN-LSLLEEPGJGTFTVILNQLTSR&2604.364694	1	1	1	1	0.990338	0.989389	0.991956	0.993615
sp|Q03403|TFF2_HUMAN-LSPHJR&925.461774	1	1	1	1	1	1	1	-1
sp|Q5JS37|NHLC3_HUMAN-LSQDFMILWLHGEJGTGPAK&2416.173324	1	0.61947	1	0.358688	0.877313	0.967975	0.464526	0.845115
sp|Q06418|TYRO3_HUMAN-LSSSJASVAWMPGADGR&1907.868374	1	1	1	1	1	1	1	1
sp|Q14703|MBTP1_HUMAN-LSWAKPQPLJETAPSNLWK&2382.221994	1	1	1	1	1	1	1	1
sp|Q8IZF2|AGRF5_HUMAN-LTIHJITPGDAGEYVCK&2089.999044	1	1	1	1	0.99026	0.987252	1	0.990217
sp|Q92673|SORL_HUMAN-LTIVJSSVLDRPR&1671.915574	0.967108	0.970155	0.949112	0.974754	0.975412	0.962428	0.96561	0.97173
sp|P07998|RNAS1_HUMAN-LTJGSRYPNCAYR&1773.810444	1	1	1	1	1	1	1	1
sp|Q8NFP4|MDGA1_HUMAN-LTJTTAPPALK&1328.718774	1	1	1	1	1	1	1	1
sp|P28906|CD34_HUMAN-LTQGICLEQJK&1505.739584	0.867094	0.911201	0.87281	0.919982	0.922337	0.873454	0.92726	0.898748
sp|Q06418|TYRO3_HUMAN-LTVSQGQPVKLJCSVEGMEEPDIQWVK&3273.589754	1	1	1	1	1	1	1	1
sp|Q8NFT8|DNER_HUMAN-LVSFEVPQJTSVK&1649.851244	0.996759	1	1	1	1	0.996059	1	1
sp|P25116|PAR1_HUMAN-LVSIJK&875.496424	1	1	-1	-1	-1	-1	-1	-1
sp|Q06828|FMOD_HUMAN-LYLDHNJLTR&1460.725974	1	0.709169	1	1	1	1	1	1
sp|P02750|A2GL_HUMAN-MFSQJDTR&1200.508134	0.630994	0.696064	0.4483	0.515884	-1	-1	-1	-1
sp|Q92673|SORL_HUMAN-MGHJYTFTVQAR&1626.746064	0.173056	0.83917	0.70917	1	0.245206	0.673324	0.667596	0.382779
sp|P21810|PGS1_HUMAN-MIEJGSLSFLPTLR&1779.907714	0.529529	0.946424	0.470394	0.949372	0.649735	0.533907	0.744666	0.517205
sp|P15260|INGR1_HUMAN-MJGSEIQYK&1271.570394	1	0.858975	1	1	1	-1	-1	-1
sp|Q9BWV1|BOC_HUMAN-MJVTWR&1008.469894	1	1	1	1	-1	1	1	1
sp|P05155|IC1_HUMAN-MLFVEPILEVSSLPTTJSTTNSATK&2882.447104	1	1	1	1	1	1	1	1
sp|P10909|CLUS_HUMAN-MLJTSSLLEQLNEQFNWVSR&2611.258844	-1	-1	1	-1	1	0.999267	1	1
sp|Q9BRN9|TM2D3_HUMAN-MLYCJWTGGYK&1594.679614	1	0.722164	0.575885	1	1	0.780833	1	1
sp|P24394|IL4RA_HUMAN-MNGPTJCSTELR&1581.676334	1	1	1	1	0.622399	0.656258	0.750177	0.606765
sp|O75882|ATRN_HUMAN-MPSQAPTGNFYPQPLLJSSMCLEDSR&3142.404594	0.717588	1	1	1	0.888467	0.768791	1	0.930413
sp|Q8N6Q3|CD177_HUMAN-MSIQGCVAQPSSFLLJHTR&2348.125324	1	0.989053	1	1	1	1	0.987803	1
sp|Q14982|OPCM_HUMAN-MSTLTFFJVSEK&1605.759654	1	1	1	1	1	1	1	1
sp|P11717|MPRI_HUMAN-MSVINFECJK&1443.637424	1	1	1	1	0.970848	0.977477	0.981835	1
sp|Q8N126|CADM3_HUMAN-MTQESALIFPFLJK&1840.928114	1	1	1	1	1	1	1	1
sp|Q9Y5I2|PCDAA_HUMAN-MYENQVJQTLVIR&1809.893124	1	-1	1	1	1	1	1	1
sp|Q6FHJ7|SFRP4_HUMAN-MYJHSWPESLACDELPVYDR&2684.152314	0.997614	0.985696	0.956783	0.970513	0.993394	0.943384	1	0.983143
sp|Q9BRN9|TM2D3_HUMAN-NFIIJMTCR&1370.632284	1	1	1	1	1	1	0.951687	1
sp|P14384|CBPM_HUMAN-NFPDAFEYNJVSR&1774.779864	0.991624	0.986834	0.979793	1	0.989006	0.983531	0.985209	0.988723
sp|Q9UBX1|CATF_HUMAN-NFVITYJR&1228.608824	1	1	1	1	0.931721	0.940181	1	1
sp|Q9BZZ2|SN_HUMAN-NILPGELVTLTCQVJSSYPAVSSIK&2892.479054	0.547552	0.579699	0.338646	0.579439	0.524677	0.256003	0.427913	0.199647
sp|Q99650|OSMR_HUMAN-NIQNJVSCYLEGK&1740.798884	0.229307	0.1556	0.103974	0.728255	0.0933361	0.0959396	0.238916	0.205684
sp|P08962|CD63_HUMAN-NJHTASILDR&1342.647734	0.973838	0.98732	1	0.997543	-1	-1	-1	-1
sp|P48740|MASP1_HUMAN-NJLTTYK&1055.513524	0.389178	0.12302	0.597425	0.0215176	-1	-1	-1	-1
sp|Q10588|BST1_HUMAN-NKJCTAIWEAFK&1683.792684	-1	-1	1	1	1	1	1	1
sp|P12821|ACE_HUMAN-NMQIAJHTLK&1371.681684	1	1	1	1	-1	1	1	1
sp|Q9UKU6|TRHDE_HUMAN-NNFJGSLVQASYQHEELRR&2464.173134	1	1	1	1	1	1	1	0.215771
sp|P16278|BGAL_HUMAN-NNVITLJITGK&1388.751144	0.14129	0.214379	0.207851	0.206171	0.227632	0.270501	0.410041	0.220005
sp|Q15223|PVRL1_HUMAN-NPJGTVTVISR&1359.699434	0.911468	0.885006	0.878277	0.904909	1	0.9254	1	0.924754
sp|Q9Y6R7|FCGBP_HUMAN-NPNNDQVFPJGTLAPSIPIWGGSWR&2939.420254	1	0.407225	0.337399	0.432471	0.289185	0.690715	0.423478	0.575776
sp|P43251|BTD_HUMAN-NPVGLIGAEJATGETDPSHSK&2296.081934	0.381494	0.475009	0.371618	0.604447	0.619282	0.533256	0.626403	0.584901
sp|P10153|RNAS2_HUMAN-NQNTFLLTTFANVVJVCGNPJMTCPSJK&3357.542824	0.487449	0.732583	0	0.681098	0.566115	0.442931	0.954919	0.580819
sp|P09603|CSF1_HUMAN-NVFJETK&1053.497884	0.99274	0.989886	0.992705	0.996457	-1	-1	-1	-1
sp|P38571|LICH_HUMAN-NYFHYJQSYPPTYNVK&2237.006544	1	1	1	1	0.729891	0.718333	0.956077	0.861439
sp|Q16769|QPCT_HUMAN-NYHQPAILJSSALR&1785.900984	0.993795	0.994434	0.996753	0.998729	0.995135	0.994546	0.996068	0.996853
sp|Q8N8Z6|DCBD1_HUMAN-NYPGTYPJHTVCEK&1881.820334	1	1	1	1	1	0.980918	1	1
sp|Q96MU8|KREM1_HUMAN-PCLFWJETFQHPYNTLK&2397.109984	-1	1	1	0.76531	0.819261	0.779123	0.871589	0.832246
sp|Q86T13|CLC14_HUMAN-PGAASJLSYR&1237.593904	0.994005	0.99827	1	0.99859	-1	1	-1	1
sp|P25940|CO5A3_HUMAN-PLPQQVJLTDGR&1539.789314	1	1	1	1	1	1	1	1
sp|P04156|PRIO_HUMAN-PMDEYSNQNNFVHDCVJITIK&2740.210894	1	1	1	1	1	1	1	1
sp|O75144|ICOSL_HUMAN-PNVYWIJK&1235.618654	0.220126	0.206144	0.160647	0.229119	0.175079	0.183138	0.219055	0.245783
sp|P20138|CD33_HUMAN-PQDHGTJLTCQVK&1699.783574	1	1	0.99012	1	-1	1	-1	1
sp|Q14703|MBTP1_HUMAN-PQPLJETAPSNLWK&1796.894504	0.431001	0.522136	0.748422	0.912954	0.882998	0.867284	0.849365	0.800192
sp|P01859|IGHG2_HUMAN-PREEQFJSTFR&1612.748174	1	1	1	1	1	1	1	1
sp|Q8IYS5|OSCAR_HUMAN-PSLVALPGPVVGPGAJVSLR&2102.173584	0.990976	0.992269	0.990422	1	0.992935	0.994352	0.99803	0.993835
sp|P49788|TIG1_HUMAN-PTIJVTCTR&1263.612924	0.840082	0.758657	0.889632	0.799138	-1	0.892315	1	0.881515
sp|P15151|PVR_HUMAN-PVDKPIJTTLICJVTNALGAR&2469.289754	1	1	1	1	1	1	0.972561	1
sp|Q9NZP8|C1RL_HUMAN-PVTPIAQJQTTLGSSR&1871.958904	0.788417	0.812984	0.681322	0.763052	0.793631	0.746416	0.73671	0.796696
sp|Q8IYS5|OSCAR_HUMAN-PWLGAQPATVVTPGVJVTLR&2278.232164	0.99191	0.985917	0.985869	0.985311	0.996692	1	0.982327	0.984753
sp|Q9H3G5|CPVL_HUMAN-QAIHVGJQTFNDGTIVEK&2173.065154	0.101869	0	0.155937	0.169926	0.208224	0.182316	0.287977	0.21546
sp|P07911|UROM_HUMAN-QDFJITDISLLEHR&1902.932354	0.900157	0.907343	0.94753	0.983871	0.942594	0.958623	0.955018	0.943857
sp|Q9BXP8|PAPP2_HUMAN-QDSCPSLLLDHADVVJCTSIGPGLMK&3029.414434	0.889757	0.980009	1	1	1	1	0.976733	1
sp|P13598|ICAM2_HUMAN-QESMNSJVSVYQPPR&1937.878924	1	1	1	1	1	1	1	1
sp|P01833|PIGR_HUMAN-QIGLYPVLVIDSSGYVNPJYTGR&2727.375564	0.879049	0.694913	0.576942	0.745726	0.719366	0.771512	0.706159	0.714918
sp|Q01459|DIAC_HUMAN-QIJSSISGNLWDK&1663.805354	0	0.143698	0.127937	0.0828556	0.236365	0.196245	0.290327	0.245211
sp|Q01459|DIAC_HUMAN-QIJSSISGNLWDKDQR&2062.991994	-1	0.263589	1	0.23047	0.397429	0.361819	0.49497	0.344787
sp|O95967|FBLN4_HUMAN-QINJVSAMLVLAR&1630.871274	-1	1	1	1	1	1	1	1
sp|P12111|CO6A3_HUMAN-QJLTVTDR&1148.567364	1	1	1	1	-1	-1	-1	-1
sp|Q5ZPR3|CD276_HUMAN-QLVHSFAEGQDQGSAYAJR&2280.040724	1	1	1	1	1	1	1	1
sp|O00592|PODXL_HUMAN-QLVLJLTGNTLCAGGASDEK&2263.100224	1	1	1	1	-1	1	1	1
sp|P02787|TRFE_HUMAN-QQQHLFGSJVTDCSGJFCLFR&2717.196264	1	0.537082	0.377569	0.553492	0.613549	0.491858	0.536369	0.46514
sp|Q8NFZ8|CADM4_HUMAN-QTLFFJGTR&1285.630294	0.983348	0.992076	1	0.967044	1	0.986654	1	0.991759
sp|P11117|PPAL_HUMAN-QTPEYQJESSR&1540.664164	1	1	1	1	1	1	1	1
sp|Q9UPZ6|THS7A_HUMAN-RGJQTALCGGGIQTR&1790.869374	1	-1	1	1	-1	1	-1	-1
sp|O14786|NRP1_HUMAN-RGPECSQJYTTPSGVIK&2095.984454	0.458281	0.223189	0.88034	1	1	1	1	0.938187
sp|P02751|FINC_HUMAN-RHEEGHMLJCTCFGQGR&2290.963024	-1	1	1	1	0.985417	1	1	1
sp|Q8NC42|RN149_HUMAN-RJASAVVLYNEER&1722.853694	1	1	-1	1	1	1	1	1
sp|Q8NDA2|HMCN2_HUMAN-RJFSVEVLVPPSIENEDLEEVIK&2857.459714	1	1	1	1	1	1	1	1
sp|P12109|CO6A1_HUMAN-RJFTAADWGQSR&1610.743764	0.925533	0.93914	0.970001	0.953652	0.980294	0.982508	0.985023	0.982691
sp|Q06481|APLP2_HUMAN-RJQSLSLLYK&1423.767114	0.97946	1	1	1	1	1	1	1
sp|Q9ULI3|HEG1_HUMAN-RJSSGPDLSWLHFYR&2036.970454	1	1	1	0.826652	-1	-1	0.595044	0.915275
sp|P19256|LFA3_HUMAN-RJSTSIYFK&1317.656504	0.92624	0.881781	0.895326	0.884616	1	1	1	1
sp|P16444|DPEP1_HUMAN-RJWTEAEVK&1334.646674	1	0.985992	0.985302	0.99437	-1	1	-1	1
sp|Q13308|PTK7_HUMAN-RQDVJITVATVPSWLK&2029.084434	1	1	1	1	1	1	1	1
sp|Q9UQV4|LAMP3_HUMAN-RYFNIDPJATQASGNCGTR&2344.050244	1	1	1	1	1	-1	0.979509	1
sp|O60568|PLOD3_HUMAN-SAEFFJYTVR&1435.661984	0.767196	0	0.728309	1	0.70166	0.668149	0.817276	0.789045
sp|Q13308|PTK7_HUMAN-SAJASFNIK&1153.561544	1	1	1	1	-1	-1	-1	1
sp|Q8N4F0|BPIB2_HUMAN-SDDNLLJTSALGR&1577.753324	0.839416	0.944034	0.943407	0.991521	1	0.972233	0.978726	0.722433
sp|Q92673|SORL_HUMAN-SDEYJCSSGMCIR&1780.670244	1	1	1	1	1	1	1	1
sp|P23470|PTPRG_HUMAN-SDFSQTMLFQAJTTR&1948.883684	1	1	1	1	1	1	0.96117	0.975564
sp|Q8NHP8|PLBL2_HUMAN-SDLNPAJGSYPFQALR&1951.927594	0.887213	0.912756	0.917512	0.925685	0.926792	0.584907	0.924471	0.935406
sp|Q86XX4|FRAS1_HUMAN-SEIHSIJITIER&1613.826094	1	1	-1	1	-1	-1	-1	-1
sp|P35052|GPC1_HUMAN-SFDDHFQHLLJDSER&2061.902844	0.777309	0.80638	0.679779	0.931611	-1	-1	0	0
sp|O15394|NCAM2_HUMAN-SFJATAER&1097.498944	1	1	-1	1	-1	-1	-1	-1
sp|P98164|LRP2_HUMAN-SFLDCTJR&1214.523774	0.953762	0.942076	0.971449	1	1	1	1	1
sp|Q9ULI3|HEG1_HUMAN-SHAASDAPEJLTLLAETADAR&2355.119044	1	1	1	0.961819	1	1	1	1
sp|P11597|CETP_HUMAN-SIDVSIQJVSVVFK&1736.919664	1	-1	-1	1	1	1	1	1
sp|Q9BYF1|ACE2_HUMAN-SIGLLSPDFQEDJETEINFLLK&2724.338204	1	1	1	1	1	1	1	1
sp|P05156|CFAI_HUMAN-SIPACVPWSPYLFQPJDTCIVSGWGR&3209.495054	1	1	0.927161	0.927668	0.934945	0.857327	0.946375	0.897558
sp|O60603|TLR2_HUMAN-SIQJVSHLILHMK&1721.913474	-1	-1	-1	1	1	1	1	1
sp|Q12913|PTPRJ_HUMAN-SJDTAASEYK&1287.546674	1	1	0.935454	0.894563	-1	-1	-1	-1
sp|Q68D85|NR3L1_HUMAN-SJFTLTAAR&1182.588094	1	1	1	1	1	1	1	1
sp|P19022|CADH2_HUMAN-SJISILR&1004.550254	0.616644	0.602764	0.627517	0.457705	-1	1	1	1
sp|P07998|RNAS1_HUMAN-SJSSMHITDCR&1509.618814	0.955718	0.978793	0.970451	0.98581	1	1	1	1
sp|Q96F46|I17RA_HUMAN-SJVTLTLR&1105.597934	1	1	1	1	1	1	1	1
sp|P02760|AMBP_HUMAN-SKWJITMESYVVHTNYDEYAIFLTK&3254.548184	-1	-1	-1	-1	1	1	0.971382	1
sp|P54289|CA2D1_HUMAN-SLDNDNYVFTAPYFJK&2109.953124	1	1	1	1	1	1	1	1
sp|Q16827|PTPRO_HUMAN-SLFAVJK&980.517894	1	-1	1	1	-1	-1	-1	-1
sp|Q6UX06|OLFM4_HUMAN-SLGSGGSVSQLFSJFTGSVDDR&2419.113954	1	0.971892	1	1	1	1	1	1
sp|P30530|UFO_HUMAN-SLHVPGLJK&1166.629564	0.942373	0.936968	0.942999	0.940507	0.959342	0.947865	0.955219	0.957819
sp|P11717|MPRI_HUMAN-SLLEFJTTVSCDQQGTNHR&2409.086694	0.0178687	0.391411	1	1	0.138063	0.313823	0.132424	0.332994
sp|Q92765|SFRP3_HUMAN-SLPWJMTK&1194.559104	-1	-1	-1	-1	-1	-1	-1	-1
sp|Q13591|SEM5A_HUMAN-SLSJLTEIHDQISGMAR&2074.000114	-1	1	1	1	1	1	1	1
sp|P98160|PGBM_HUMAN-SLTQGSLIVGDLAPVJGTSQGK&2344.212214	1	-1	1	1	1	-1	1	-1
sp|P08195|4F2_HUMAN-SLVTQYLJATGNR&1638.821334	0.394364	0.852	0.405641	0.798598	0.228145	0.232287	0.793095	0.302433
sp|Q99784|NOE1_HUMAN-SMVDFMNTDJFTSHR&2003.835354	1	1	1	1	1	1	1	-1
sp|P11362|FGFR1_HUMAN-SPHRPILQAGLPAJK&1800.984664	0.824625	-1	1	0.817597	0.881241	0.894232	0.886063	0.892878
sp|P14384|CBPM_HUMAN-SQJFSALK&1096.540084	0.960607	0.976583	0.949085	0.966912	-1	-1	-1	-1
sp|P14384|CBPM_HUMAN-SQJFSALKK&1224.635044	1	0.977449	0.96003	0.974521	-1	-1	-1	-1
sp|P11279|LAMP1_HUMAN-SSCGKEJTSDPSLVIAFGR&2227.042704	0.97354	1	1	1	1	0.96857	1	1
sp|O60494|CUBN_HUMAN-SSJNSMLLVFK&1441.712304	0.928005	0.90911	0.920009	0.952614	0.933198	0.871768	0.925081	0.946571
sp|Q6GTX8|LAIR1_HUMAN-STYJDTEDVSQASPSESEAR&2374.988474	0.99455	0.998024	1	1	0.992247	0.990855	0.993222	0.987144
sp|Q99650|OSMR_HUMAN-SVNILFJLTHR&1515.804574	-1	-1	1	1	1	1	1	1
sp|Q86TH1|ATL2_HUMAN-SVPGPGJR&985.482904	0.988304	-1	1	1	-1	-1	-1	-1
sp|P08887|IL6RA_HUMAN-SVQLHDSGJYSCYR&1887.805744	0.873833	0.91214	0.83509	0.898565	0.416649	0.25376	0.701604	0.334118
sp|Q9Y6R7|FCGBP_HUMAN-SVTLQIYJHSLTLSAR&2005.048044	-1	1	1	1	1	1	1	1
sp|P41222|PTGDS_HUMAN-SVVAPATDGGLJLTSTFLR&2121.095394	0.97821	0.954385	0.979997	0.981961	0.995587	0.97954	0.957341	0.985473
sp|P41222|PTGDS_HUMAN-SVVAPATDGGLJLTSTFLRK&2249.190354	0.994075	0.995212	0.994377	0.997271	1	0.997147	0.997516	1
sp|P02790|HEMO_HUMAN-SWPAVGJCSSALR&1606.740984	0.569731	0.551436	0.37693	0.366517	0.595716	0.413248	0.498015	0.40827
sp|P80188|NGAL_HUMAN-SYJVTSVLFR&1387.698364	1	0.9353	0.913954	0.763299	0.821381	0.7928	0.778255	0.799138
sp|Q9ULI3|HEG1_HUMAN-SYSESSSTSSSESLJSSAPR&2251.956444	0.731904	1	0.789011	1	0.928804	1	1	1
sp|P11362|FGFR1_HUMAN-TAGVJTTDKEMEVLHLR&2116.047064	1	1	1	1	-1	1	-1	1
sp|P02788|TRFL_HUMAN-TAGWNIPMGLLFJQTGSCK&2297.082064	1	1	0.972531	1	1	0.969556	1	0.986691
sp|P35555|FBN1_HUMAN-TAIFAFJISHVSNK&1750.889024	0.997307	0.998342	0.996864	0.998536	0.997069	0.998659	0.999684	0.99824
sp|Q5ZPR3|CD276_HUMAN-TALFPDLLAQGJASLR&1888.989474	0.791543	0.777324	0.821441	0.827189	0.856487	0.840772	0.805543	0.861106
sp|Q9UBX7|KLK11_HUMAN-TATESFPHPGFJNSLPNK&2160.012394	0.926074	0.936283	0.936205	0.934973	0.933357	0.931609	0.979385	1
sp|Q06418|TYRO3_HUMAN-TATVHLQALPAAPFJITVTK&2295.247484	1	1	1	1	1	1	1	1
sp|P13987|CD59_HUMAN-TAVJCSSDFDACLITK&2003.881634	0.994813	0.994744	0.994928	0.996055	0.993707	0.992435	0.993346	0.995105
sp|P07602|SAP_HUMAN-TCDWLPKPJMSASCK&1996.869294	0.994598	0.993432	0.996209	0.994773	0.992521	0.992938	0.997414	0.996466
sp|P33908|MA1A1_HUMAN-TCHESYJR&1268.509184	0.976375	0.990093	0.987276	0.987071	-1	-1	-1	-1
sp|Q8IWA5|CTL2_HUMAN-TCNPETFPSSJESR&1827.758144	1	1	1	1	1	1	1	1
sp|P08519|APOA_HUMAN-TCQAWSSMTPHQHJR&2042.868724	1	0.668463	-1	0.428814	1	1	1	0.765025
sp|Q66K79|CBPZ_HUMAN-TCSDAAYJHTTFPNLLQHR&2448.112844	-1	1	1	1	1	1	1	0.957953
sp|P15328|FOLR1_HUMAN-TELLJVCMNAK&1494.705844	1	1	0.945227	1	1	1	1	1
sp|P48960|CD97_HUMAN/sp|Q9UHX3|AGRE2_HUMAN-TFKJESEJTCQDVDECQQNPR&2801.150494	0.762128	0.875693	0.542348	1	1	0.802446	0.946046	0.819237
sp|Q13402|MYO7A_HUMAN-TFVJGTR&996.487654	1	1	1	1	-1	-1	-1	-1
sp|P12273|PIP_HUMAN-TFYWDFYTJR&1614.699084	0.996415	0.986191	0.990739	0.983895	1	0.990488	1	1
sp|Q9UQV4|LAMP3_HUMAN-TGIYQVLJGSR&1409.715084	0.974446	0.96433	1	0.976168	0.940283	0.969973	0.93275	0.970164
sp|Q7Z7M0|MEGF8_HUMAN-TGYTMDJMTGLCR&1721.705914	0.719978	0.814954	0.733158	0.817017	0.862833	0.77423	0.87376	0.86906
sp|P00749|UROK_HUMAN-TIQTICLPSMYNDPQFGTSCEITGFGKEJSTDYLYPEQLK&4848.213254	-1	-1	1	1	-1	-1	1	1
sp|Q12913|PTPRJ_HUMAN-TITVVHQPWCJITGLR&2097.067734	1	1	1	1	0.966391	0.960758	1	0.973166
sp|P04216|THY1_HUMAN-TJFTSK&899.423654	1	1	1	0.993675	-1	-1	-1	-1
sp|P07602|SAP_HUMAN-TJSTFVQALVEHVK&1774.910164	-1	0.945427	0.959436	0.919376	0.943704	0.954404	0.976147	0.95924
sp|P07602|SAP_HUMAN-TJSTFVQALVEHVKEECDR&2464.154044	-1	-1	-1	0.86147	0.944259	0.917436	0.968073	0.90329
sp|Q96EE4|CC126_HUMAN-TJVSGSIR&1035.519684	1	1	1	1	-1	-1	-1	-1
sp|P01857|IGHG1_HUMAN-TKPREEQYJSTYR&1873.880634	1	1	0.99141	1	-1	-1	-1	-1
sp|Q8NDA2|HMCN2_HUMAN-TKVJSTLTLECESWAVPPPTIR&2701.363314	1	1	1	1	1	1	1	1
sp|Q92859|NEO1_HUMAN-TPASDPHGDJLTYSVFYTK&2315.059384	1	1	1	1	1	1	1	1
sp|P28908|TNR8_HUMAN-TPCAWJSSR&1280.545574	1	1	1	1	-1	-1	-1	-1
sp|P01877|IGHA2_HUMAN-TPLTAJITK&1160.628904	0.997346	0.996406	0.996219	1	1	0.996645	1	0.996625
sp|P15586|GNS_HUMAN-TPMTJSSIQFLDNAFR&2043.957184	0.0463187	0.156043	0.134312	0.0677627	0.208774	0.0649672	0.477007	0.409526
sp|P50895|BCAM_HUMAN-TQJFTLLVQGSPELK&1876.978244	0.265639	0.304116	0.244783	0.300688	0.31872	0.329364	0.34684	0.417137
sp|Q9UN70|PCDGK_HUMAN-TSADLDRETVPEYJLSITAR&2453.192204	1	1	1	1	1	1	1	1
sp|Q9UBG0|MRC2_HUMAN-TSJISKPGTLER&1504.773334	1	1	1	1	-1	1	-1	1
sp|Q7Z4F1|LRP10_HUMAN-TSPAJCTWLILGSK&1749.860764	0.990838	0.99261	1	1	1	0.992323	0.994787	0.995665
sp|P20138|CD33_HUMAN-TTHSSVLIITPRPQDHGTJLTCQVK&3005.524064	-1	1	1	1	-1	-1	1	-1
sp|P55287|CAD11_HUMAN-TTKPLDREETAWLJITVFAAEIHNR&3127.593864	-1	-1	1	1	-1	-1	-1	-1
sp|P30530|UFO_HUMAN-TVAANTPFJLSCQAQGPPEPVDLLWLQDAVPLATAPGHGPQR&4636.302054	1	1	1	1	1	0.991239	0.995516	1
sp|P14384|CBPM_HUMAN-TVAQJYSSVTHLHSIGK&2044.022554	0.992632	0.994146	0.995072	0.994932	0.991329	0.993219	0.997193	0.994867
sp|Q08380|LG3BP_HUMAN-TVIRPFYLTJSSGVD&1870.931284	1	0.229265	1	0.845234	1	0.859696	1	-1
sp|P13473|LAMP2_HUMAN-TVTISDHGTVTYJGSICGDDQNGPK&2838.261414	1	1	0.996773	1	0.987938	0.98606	0.938114	0.99418
sp|O75144|ICOSL_HUMAN-TVVTYHIPQJSSLENVDSR&2361.144854	0.961131	0.967437	0.932198	0.967426	0.977711	0.958954	0.971223	0.963353
sp|P16112|PGCA_HUMAN-TVYLYPJQTGLPDPLSR&2136.073914	0.998502	0.997471	1	1	1	1	1	1
sp|P16112|PGCA_HUMAN-TVYVHAJQTGYPDPSSR&2093.965424	1	1	1	1	1	0.987483	0.973779	1
sp|Q8NDA2|HMCN2_HUMAN-VAGEJASLPCPAR&1543.730084	1	1	1	1	1	1	1	0.33175
sp|Q9Y653|GPR56_HUMAN-VAJLTEPVVLTFQHQLQPK&2364.268944	1	1	1	1	1	1	0.998465	1
sp|Q14314|FGL2_HUMAN-VAJLTFVVNSLDGK&1678.877794	1	1	1	1	1	1	1	1
sp|Q9Y2G1|MRF_HUMAN-VALLGQAJCSSEALAQPATDYHFHFYR&3268.524774	0	0	1	0.588599	0.241502	0.694702	0.439665	0.496015
sp|O43505|B4GA1_HUMAN-VAQPGINYALGTJVSYPNNLLR&2576.323474	1	0.882053	0.86376	0.952942	0.795676	0.756887	0.930008	0.953105
sp|O60494|CUBN_HUMAN-VASPFWPENYPHNSNYQWTVNVJASHVVHGR&3808.777114	-1	-1	-1	-1	1	1	1	1
sp|P13473|LAMP2_HUMAN-VASVININPJTTHSTGSCR&2230.064834	0.945053	0.994955	0.995119	0.997079	0.98164	0.981332	0.979374	0.994111
sp|P98164|LRP2_HUMAN-VCDGILDCPGREDEJJTSTGK&2539.080284	1	1	1	1	0.995329	0.983194	0.986992	0.990298
sp|O60494|CUBN_HUMAN-VCGJGTISHIK&1387.676594	0.86592	0.868133	0.846822	0.951569	-1	-1	-1	-1
sp|P12821|ACE_HUMAN-VCLPJK&932.463744	0.76705	0.873002	1	1	-1	-1	-1	-1
sp|P02765|FETUA_HUMAN-VCQDCPLLAPLJDTR&1973.918684	0.0271641	0.0325604	0.0210205	0.0408268	0.120929	0.050776	0.0816615	0.048211
sp|Q9BY67|CADM1_HUMAN-VDDEMPQHAVLSGPNLFINNLJK&2767.348724	0.806706	0.578914	0.59179	0.650976	0.435166	0.379134	0.599901	0.459699
sp|P19022|CADH2_HUMAN-VDIIVAJLTVTDKDQPHTPAWNAVYR&3138.598604	-1	0.920584	0.912593	0.974563	0.886331	0.82198	0.907738	0.888145
sp|P55083|MFAP4_HUMAN-VDLEDFEJNTAYAK&1830.815974	0.260063	1	1	1	1	1	0.992774	1
sp|P15151|PVR_HUMAN-VEDEGJYTCLFVTFPQGSR&2421.079474	0.889658	0.874817	0.841985	0.960445	0.892998	0.798114	0.844931	0.86133
sp|P23470|PTPRG_HUMAN-VEFHWGHSJGSAGSEHSINGR&2467.090144	1	1	1	1	0.991643	1	1	0.957794
sp|Q9BQ51|PD1L2_HUMAN-VEJDTSPHR&1256.563334	1	1	1	1	-1	-1	-1	-1
sp|P55290|CAD13_HUMAN-VFHINQPAEFIEDQSILJLTFSDCK&3167.512154	1	1	1	1	0.994706	1	1	1
sp|P55290|CAD13_HUMAN-VFHINQPAEFIEDQSILJLTFSDCKGNDK&3581.698454	-1	0.654834	-1	1	-1	-1	-1	-1
sp|Q9H159|CAD19_HUMAN-VFNINDJGTITTSNSLDR&2183.034254	1	1	1	1	1	1	1	1
sp|P54802|ANAG_HUMAN-VFPQVJVTK&1233.660534	0.325487	0.426528	0.29795	0.357064	0.481249	0.409586	0.555611	0.418385
sp|Q12907|LMAN2_HUMAN-VFPYISVMVNJGSLSYDHSK&2459.167884	1	0.988112	0.985126	0.992999	0.987312	0.984655	0.985418	0.981385
sp|P23470|PTPRG_HUMAN-VGEEYQELQLDGFDJESSJK&2503.087464	1	-1	1	0.191942	1	0.427745	1	1
sp|Q9UBP4|DKK3_HUMAN-VGJNTIHVHR&1348.684794	0.736601	0.604508	0.6376	0.64228	-1	-1	-1	-1
sp|P05155|IC1_HUMAN-VGQLQLSHJLSLVILVPQNLK&2515.437404	0.894647	0.893392	0.879885	0.908947	0.849666	0.856809	0.824823	0.878032
sp|Q96J84|KIRR1_HUMAN-VGSTJVSTLVNVHFAPR&2000.032734	1	1	1	1	1	1	1	1
sp|P22304|IDS_HUMAN-VHAGJFSTIPQYFK&1810.889024	0.189062	0.476354	0.759873	0.587004	0.45305	0.314338	0.41351	0.51809
sp|P35968|VGFR2_HUMAN-VIGJDTGAYK&1239.598314	1	1	1	1	-1	1	-1	1
sp|Q9Y4L1|HYOU1_HUMAN-VIJETWAWK&1348.666344	1	1	1	1	1	0.974441	1	1
sp|Q9Y6R7|FCGBP_HUMAN-VITVQVAJFTLR&1562.866834	1	0.959696	0.866732	0.960354	0.763691	0.91847	1	0.947679
sp|Q8IZA0|K319L_HUMAN-VIVEGQNAHGEGYVJVTVKPEPR&2694.361334	1	1	1	1	1	1	1	1
sp|O60279|SUSD5_HUMAN-VIYGNTDGPSGPFVGKJDSK&2254.075374	1	1	1	1	1	1	1	1
sp|P16109|LYAM3_HUMAN-VJCSHPFGAFR&1493.672174	1	1	-1	-1	1	1	1	1
sp|Q8N2S1|LTBP4_HUMAN-VJGSCEDVDECATGGR&1927.752404	1	1	1	1	1	1	1	1
sp|P43626|KI2L1_HUMAN/sp|P43627|KI2L2_HUMAN/sp|P43628|KI2L3_HUMAN/sp|P43631|KI2S2_HUMAN-VJGTFQADFPLGPATHGGTYR&2408.139714	0.968942	1	0.955242	1	1	0.823329	1	1
sp|Q9UEF7|KLOT_HUMAN-VJITPVVALWQPMAPNQGLPR&2503.325744	1	1	1	1	1	1	1	1
sp|P09603|CSF1_HUMAN-VKNVFJETK&1280.661264	-1	1	1	1	-1	-1	-1	-1
sp|P40189|IL6RB_HUMAN-VKPNPPHJLSVINSEELSSILK&2617.396324	1	0.994165	1	1	0.994502	0.992966	0.987852	0.996895
sp|Q8TD46|MO2R1_HUMAN-VLAEVJTSWPVK&1544.808654	1	0.85911	0.936014	1	1	1	1	1
sp|Q9UN70|PCDGK_HUMAN-VLDANDNAPVFJQSLYR&2138.028034	0.97024	0.901107	0.947962	0.834219	0.806643	0.818506	0.908813	0.77605
sp|Q8NDA2|HMCN2_HUMAN-VLDGQTAHLMCJVTGHPQPK&2405.146794	1	0.985031	1	1	1	1	1	1
sp|O60487|MPZL2_HUMAN-VLEAVJGTDAR&1346.667804	0.705795	0.744187	0.478068	0.816406	-1	1	-1	-1
sp|Q9UEF7|KLOT_HUMAN-VLPJGSAGVPNR&1382.715424	1	0.961739	1	0.952243	1	1	1	0.960466
sp|P05154|IPSP_HUMAN-VLPSLGISNVFTSHADLSGISJHSNIQVSEMVHK&3819.910184	-1	1	-1	1	1	1	1	1
sp|P35555|FBN1_HUMAN-VLPVJVTDYCQLVR&1877.955714	1	1	1	1	1	1	1	1
sp|P05155|IC1_HUMAN-VLSJNSDANLELINTWVAK&2303.164534	0.99511	0.993383	0.990052	0.991337	0.979531	0.989075	0.983083	0.948838
sp|Q14161|GIT2_HUMAN-VNNJLSDELR&1375.657964	1	1	1	1	1	1	1	1
sp|P32004|L1CAM_HUMAN-VPGJQTSTTLK&1347.688204	1	1	0.914783	0.959868	-1	-1	-1	-1
sp|P01833|PIGR_HUMAN-VPGJVTAVLGETLK&1599.871984	0.989959	0.991193	0.989395	0.992948	0.988044	0.987485	0.989885	0.991755
sp|Q8TEB7|RN128_HUMAN-VPHTGVJR&1081.551654	1	1	1	1	-1	-1	-1	-1
sp|Q8WZ75|ROBO4_HUMAN-VPSAPPQEVTLKPGJGTVFVSWVPPPAENHNGIIR&3907.026874	1	1	1	1	1	1	1	1
sp|P20151|KLK2_HUMAN-VPVSHSFPHPLYJMSLLK&2268.161294	0	0.0121697	0	0.211466	0.16078	0.213392	0.065082	0.0992211
sp|Q9H741|CL049_HUMAN-VQFNLGJSSR&1323.641924	-1	1	-1	1	1	1	1	1
sp|Q96SM3|CPXM1_HUMAN-VQFSJDSR&1154.520414	1	0.539683	1	-1	-1	-1	-1	-1
sp|P13473|LAMP2_HUMAN-VQPFJVTQGK&1319.672164	0.401402	0.426006	0.466679	0.477742	0.619991	0.315816	0.53586	0.548557
sp|Q24JP5|T132A_HUMAN-VQQVGHYPPAJSSLSSR&2028.986504	1	-1	1	1	1	1	1	1
sp|P55058|PLTP_HUMAN-VSJVSCQASVSR&1495.693694	1	1	1	0.85734	-1	-1	-1	-1
sp|P14207|FOLR2_HUMAN/sp|P15328|FOLR1_HUMAN/sp|P41439|FOLR3_HUMAN-VSJYSR&927.429794	1	1	0.979759	0.796707	-1	1	1	-1
sp|Q9BY67|CADM1_HUMAN-VSLTJVSISDEGR&1578.773724	0.836731	0.829992	0.59156	0.709872	0.756408	0.720417	0.810314	0.665292
sp|Q9UBG0|MRC2_HUMAN-VTPACJTSLPAQR&1616.782844	1	1	1	1	1	1	1	1
sp|Q9Y6R7|FCGBP_HUMAN-VTVRPGESVMVJISAK&1888.992844	1	1	0.954342	1	0.579374	0.818115	1	0.857308
sp|P08236|BGLR_HUMAN-VVAJGTGTQGQLK&1474.762774	0.105892	0.092483	0.101976	0.114759	-1	-1	-1	-1
sp|P05154|IPSP_HUMAN-VVGVPYQGJATALFILPSEGK&2362.242054	0.96681	0.983127	0.978162	0.970965	0.97633	0.969134	0.978274	0.976936
sp|Q5ZPR3|CD276_HUMAN-VVLGAJGTYSCLVR&1710.861094	0.995799	0.992415	0.994942	0.997519	0.997028	0.995343	1	0.998561
sp|Q9HC84|MUC5B_HUMAN-VVLLDPKPVAJVTCVNK&2068.123854	-1	0.819672	0.744529	0.840342	-1	0.721966	-1	-1
sp|Q9UN75|PCDAC_HUMAN-VVLSENVQJDTR&1575.774064	1	1	1	1	1	1	1	1
sp|Q8N436|CPXM2_HUMAN-VVNEMCPJITR&1534.711994	0.858006	0	0.952584	1	0.849205	0.579652	0.634937	0.698147
sp|P16234|PGFRA_HUMAN-VVQLJSSFSLR&1451.762034	1	1	1	1	1	1	1	1
sp|Q07699|SCN1B_HUMAN-VVWJGSR&1019.503634	0.995752	0.996502	0.990243	0.990129	-1	1	-1	-1
sp|P15309|PPAP_HUMAN-VYDPLYCESVHJFTLPSWATEDTMTK&3306.473704	0.925926	0.968155	0.941457	0.931323	0.949818	0.953214	0.959754	0.911959
sp|P02749|APOH_HUMAN-VYKPSAGJNSLYR&1670.826414	0.867303	0.843343	0.718394	0.784733	0.907367	0.745928	0.806959	0.761399
sp|P03951|FA11_HUMAN-VYSGILJQSEIK&1552.798474	1	-1	1	0.667198	0.798481	0.614956	0.643018	0.794784
sp|O43405|COCH_HUMAN-VYSLPGREJYSSVDANGIQSQMLSR&2973.413824	1	1	1	1	0.0806925	1	1	1
sp|Q6ZNA5|FRRS1_HUMAN-VYWNAPSSAPJHTQFLVTVVEK&2689.338804	1	1	1	1	1	1	1	1
sp|P28827|PTPRM_HUMAN-WEPFGYJVTR&1470.677964	1	1	1	1	0	1	0.805217	1
sp|P41222|PTGDS_HUMAN-WFSAGLASJSSWLR&1783.852974	0.995193	0.994531	0.999154	0.998034	0.994575	0.990854	0.994646	0.994251
sp|P02760|AMBP_HUMAN-WJITMESYVVHTNYDEYAIFLTK&3039.421194	-1	-1	-1	0.202447	1	0.186914	-1	0.294667
sp|P01833|PIGR_HUMAN-WJNTGCQALPSQDEGPSK&2190.948804	0.377766	0.323856	0.222399	0.393236	0.415566	0.314367	0.299363	0.381635
sp|P0C7U0|ELFN1_HUMAN-WLAAFTJATQTYDR&1859.869014	1	1	0.781092	1	1	1	1	0.919462
sp|P08887|IL6RA_HUMAN-WLSVTWQDPHSWJSSFYR&2498.129144	-1	1	1	-1	0.694226	0.60306	1	0.848586
sp|P43251|BTD_HUMAN-WNPCLEPHRFJDTEVLQR&2513.175784	-1	-1	-1	0.995303	1	1	1	1
sp|Q8NFZ8|CADM4_HUMAN-WNRGJESLPER&1559.732864	1	1	1	1	1	1	1	1
sp|P13473|LAMP2_HUMAN-WQMJFTVR&1283.596884	0.858457	0.734017	0.7262	0.944267	0.63481	0.521507	0.767339	0.748212
sp|Q99519|NEUR1_HUMAN-WSFSJGTSWR&1429.626274	0.114503	0.11811	0.127362	0.0810231	0.115029	0.100942	0.0975473	0.108388
sp|P16871|IL7RA_HUMAN-WTHVJLSSTK&1374.677974	1	1	1	1	1	1	-1	1
sp|Q99574|NEUS_HUMAN-WVEJNTNNLVK&1532.747114	0.99299	1	1	1	1	1	0.990011	0.990803
sp|P54753|EPHB3_HUMAN-YAAVJITTNQAAPSEVPTLR&2318.175424	0.939093	0.880266	0.892037	0.906314	0.938618	0.861776	0.966366	1
sp|O60494|CUBN_HUMAN-YCGNSFPLJYSSIVGHTLWVR&2672.269334	-1	1	1	1	-1	-1	1	-1
sp|Q8IZF2|AGRF5_HUMAN-YEEQQLEIQJSSR&1825.833024	0.841713	1	1	1	0.537934	0.790388	0.894723	0.601002
sp|Q9UQV4|LAMP3_HUMAN-YFNIDPJATQASGNCGTR&2187.949124	1	1	0.0706882	1	0.854491	0.74424	0.911151	0.865286
sp|Q16769|QPCT_HUMAN-YFQJYSYGGVIQDDHIPFLR&2634.239074	0.999402	0.998258	0.999425	1	0.9985	0.998327	0.998766	0.998963
sp|P10646|TFPI1_HUMAN-YFYNJQTK&1279.572094	1	1	1	1	-1	-1	-1	-1
sp|Q6ZNG9|KRBA2_HUMAN-YGJVTK&883.428734	1	1	1	1	-1	-1	-1	-1
sp|P11117|PPAL_HUMAN-YHGFLJTSYHR&1596.732114	-1	1	-1	1	0.956905	0.955961	0.965359	0.962113
sp|P19438|TNR1A_HUMAN-YIHPQJNSICCTK&1836.813484	1	0.296862	0.325251	1	1	1	1	0.528281
sp|O43490|PROM1_HUMAN-YILAQYJTTK&1416.713674	1	1	1	1	1	1	1	1
sp|P01871|IGHM_HUMAN-YKJNSDISSTR&1486.689984	0.978278	0.970702	0.965663	0.983584	1	1	1	1
sp|P24855|DNAS1_HUMAN-YLFVYRPDQVSAVDSYYYDDGCEPCGJDTFNREPAIVR&4753.101314	-1	1	1	1	1	1	1	1
sp|P01009|A1AT_HUMAN-YLGJATAIFFLPDEGK&1957.967334	0.796896	0.701382	0.733621	0.846305	0.641278	0.701303	0.435516	0.740756
sp|A8MVW5|HECA2_HUMAN-YLLGSVJK&1095.581214	1	1	1	1	-1	1	1	1
sp|Q9Y6R7|FCGBP_HUMAN-YLPVJSSLLTSDCSER&2042.946664	1	1	1	1	1	1	1	1
sp|P09668|CATH_HUMAN-YLWSEPQJCSATK&1785.787984	-1	0.644174	0.810265	0.774271	0.676558	0	-1	0.772231
sp|P01042|KNG1_HUMAN-YNSQJQSNNQFVLYR&2076.950104	0.950262	0.959317	0.933575	0.958971	0.956813	0.956821	0.95766	0.953808
sp|P43251|BTD_HUMAN-YQFNTNVVFSNJGTLVDR&2290.086614	0.887209	0.849148	0.935403	1	0.796531	0.825856	0.761805	0.774907
sp|P43234|CATO_HUMAN-YSAEVHMSIPJVSLPLR&2115.067064	1	0.98296	0.967034	1	0.904739	0.847769	0.922645	0.897435
sp|Q14126|DSG2_HUMAN-YVQJGTYTVK&1374.666724	1	0.973965	1	1	-1	1	-1	1
sp|P13473|LAMP2_HUMAN-AASTYSIDSVSFSYNTGDJTTFPDAEDK&3205.373524	1	0.362847	-1	-1	1	1	1	1
sp|P28300|LYOX_HUMAN-AEJQTAPGEVPALSNLRPPSR&2406.213944	1	1	1	1	1	1	-1	1
sp|Q96JQ0|PCD16_HUMAN-AQALLDVTLLDINDHAPAFJQSR&2724.371904	1	1	1	1	1	1	1	0.934937
sp|P08185|CBG_HUMAN-AQLLQGLGFJLTER&1761.926144	0.410042	0.44512	0.549904	1	0.757657	0.804901	0.774609	0.611353
sp|P54760|EPHB4_HUMAN-CAQLTVJLTR&1377.692244	1	1	-1	-1	1	1	1	1
sp|Q8WWQ8|STAB2_HUMAN-CDNJDTTIIR&1423.624954	-1	1	-1	-1	1	1	1	1
sp|Q08334|I10R2_HUMAN-CMJTTLTECDFSSLSK&2095.874834	1	1	1	1	1	1	1	1
sp|P11717|MPRI_HUMAN-DAGVGFPEYQEEDJSTYNFR&2540.061574	1	1	1	-1	1	1	1	1
sp|Q08380|LG3BP_HUMAN-DAGVVCTJETR&1423.624954	0.994343	1	1	1	-1	-1	-1	1
sp|Q8TAB3|PCD19_HUMAN-DGGLPSLQSJATVR&1616.800614	1	1	1	1	1	1	1	1
sp|P13591|NCAM1_HUMAN-DGQLLPSSJYSNIK&1737.842134	1	1	1	1	1	1	1	1
sp|Q99941|ATF6B_HUMAN-DHLLLPAISHJK&1559.830784	1	-1	1	1	1	1	1	-1
sp|P07602|SAP_HUMAN-DJATEEEILVYLEK&1867.893894	0.916152	0.806141	0.866887	0.755796	0.930513	0.894314	0.888248	0.912978
sp|P14384|CBPM_HUMAN-DPEITNLIJSTR&1574.778814	1	1	1	1	1	1	1	1
sp|Q9BY67|CADM1_HUMAN-DVTVIEGEVATISCQVJK&2164.056954	1	1	-1	1	0.969754	0.842681	0.868513	0.914112
sp|Q14982|OPCM_HUMAN-DYGJYTCVATNK&1607.677364	1	1	1	1	1	1	1	1
sp|P98164|LRP2_HUMAN-EFICNGVDNCHDJJTSDEK&2469.964924	1	1	1	1	1	1	1	1
sp|Q07075|AMPE_HUMAN-EGITLJSSNPSGNAFLK&1950.953474	1	1	1	1	1	1	1	1
sp|P08473|NEP_HUMAN-EIAJATAKPEDR&1516.736944	1	1	1	1	-1	-1	-1	-1
sp|O43405|COCH_HUMAN-EJYSSVDANGIQSQMLSR&2200.990664	0.53386	0.307925	0.502735	0.562392	0.627693	0.631111	0.698283	0.588555
sp|Q6V0I7|FAT4_HUMAN-ELASQIVLJISAR&1615.878134	1	-1	-1	-1	1	1	1	0.922927
sp|Q12866|MERTK_HUMAN-ELLEEVGQJGSR&1532.731864	0.773866	0.839499	1	1	1	1	1	1
sp|Q9H2A7|CXL16_HUMAN-ELTRPJETTIHTAGHSLAAGPEAGENQK&3131.511984	0.966717	1	-1	1	1	1	-1	1
sp|Q8TAB3|PCD19_HUMAN-EQHDQYJLTIQAR&1817.854424	1	1	1	-1	1	1	1	1
sp|A0A5B9|TRBC2_HUMAN/sp|P01850|TRBC1_HUMAN-EQPALJDSR&1231.568084	1	0.714407	0.774179	1	-1	-1	-1	-1
sp|O75976|CBPD_HUMAN-FANEYPJITR&1426.672884	1	1	1	1	0.112053	1	1	1
sp|P28827|PTPRM_HUMAN-FIASFNVVJTTK&1542.793004	1	1	1	1	1	1	1	1
sp|Q99835|SMO_HUMAN-FJSSGQCEVPLVR&1694.793414	0.102588	1	1	0.251375	1	1	1	1
sp|O60494|CUBN_HUMAN-FSDFDVVPSTSCSHDYLAIYDGAJTSDPLLGK&3693.666864	1	1	1	0.550518	0.628236	1	0.307656	0.879863
sp|P41217|OX2G_HUMAN-FSEDHLJITCSATAR&1923.863284	0.209745	0.228735	0.173438	0.24643	0	0.239858	0.490631	0
sp|Q96B86|RGMA_HUMAN-GDLAYHSAVHGIEDLMSQHJCSK&2771.227944	-1	-1	-1	-1	1	1	1	1
sp|Q7Z6M3|MILR1_HUMAN-GEPAIFJLSITEAHESGPYK&2362.132894	-1	1	1	1	1	1	1	1
sp|Q969P0|IGSF8_HUMAN-GETASLLCJISVR&1621.798164	1	1	1	-1	1	1	1	1
sp|P04233|HG2A_HUMAN-GHHJCSESLELEDPSSGLGVTK&2555.144604	1	1	1	1	1	1	1	1
sp|P03951|FA11_HUMAN-GINYJSSVAK&1254.609214	0.65476	0	0.664611	0.803926	-1	-1	-1	1
sp|P01133|EGF_HUMAN-GJNSHILLSALK&1468.788584	0.981403	1	1	1	0.994785	0.994567	1	0.994972
sp|Q9NQS3|PVRL3_HUMAN-GPDSLIDGGJETVAAICIAATGK&2432.174114	1	1	1	1	1	1	1	1
sp|O60494|CUBN_HUMAN-GSFTSPGYPGTYPJNTYCEWVLVAPAGR&3263.486984	1	1	1	1	1	1	1	1
sp|P42702|LIFR_HUMAN-GVEJSSYLVALDK&1596.788304	0.110812	0.22739	0.120103	0.0561438	0.190235	0.20323	0.128075	0.215446
sp|P01042|KNG1_HUMAN-HGIQYFNJNTQHSSLFMLNEVK&2823.328654	-1	-1	-1	-1	0.920093	0.877854	0.892266	0.91537
sp|Q9UN73|PCDA6_HUMAN-IFENADJGTTVIR&1651.805364	1	1	1	1	1	1	1	1
sp|Q6YHK3|CD109_HUMAN-IJYTVPQSGTFK&1556.772264	1	1	1	1	1	1	1	1
sp|Q13873|BMPR2_HUMAN-ISHEJGTILCSK&1560.745394	1	1	1	1	1	1	-1	1
sp|O75882|ATRN_HUMAN-ISJSSDTVECECSENWK&2246.894374	1	1	-1	-1	1	1	1	1
sp|P19075|TSN8_HUMAN-IVJETLYENTK&1525.751194	1	1	1	1	1	1	1	1
sp|P19022|CADH2_HUMAN-IVSQAPSTPSPNMFTINJETGDIITVAAGLDR&3531.740324	0.956446	0.852256	0.752763	0.852003	0.809394	0.683005	0.897738	0.81119
sp|P24394|IL4RA_HUMAN-IYJVTYLEPSLR&1669.856314	1	1	1	1	1	1	1	1
sp|P15144|AMPN_HUMAN-JATLVNEADKLR&1545.799884	1	0.876607	0.957387	1	0.823548	1	0.882087	0.964834
sp|Q10588|BST1_HUMAN-JCTAIWEAFK&1441.654794	-1	1	-1	-1	0.659861	0.431882	1	0.687715
sp|Q9Y6R7|FCGBP_HUMAN-JECGILADPK&1318.607504	1	0.840053	1	0.438422	1	1	1	1
sp|Q9NZV1|CRIM1_HUMAN-JESCGGTFGIYGTCDR&1995.793874	1	-1	-1	0	0.692904	0.693796	1	0.891834
sp|P34925|RYK_HUMAN-JFTVLNFK&1184.607764	1	1	1	1	1	1	1	1
sp|Q6UXH9|PAMR1_HUMAN-JGSWGGTLDDFYVK&1760.789364	1	1	1	1	1	1	1	0.842898
sp|P22891|PROZ_HUMAN-JGTDLGNSLTTR&1450.689994	0.552503	0.564336	0.310291	0.554988	0.898332	0.405913	0	0.613571
sp|P15529|MCP_HUMAN-JHTWLPVSDDACYR&1935.842144	-1	-1	-1	-1	1	1	1	1
sp|P40197|GPV_HUMAN-JLSSLESVQLDHNQLETLPGDVFGALPR&3251.631034	1	-1	-1	1	1	1	-1	-1
sp|P0C7U0|ELFN1_HUMAN-JLTEGMLR&1135.554354	1	1	1	1	1	0.892653	1	0.916909
sp|A6NGU5|GGT3_HUMAN/sp|P19440|GGT1_HUMAN/sp|P36268|GGT2_HUMAN-JMTSEFFAAQLR&1616.750484	1	1	-1	1	0.888634	0.180622	0.539718	0.617083
sp|Q14956|GPNMB_HUMAN-JSSDETFLK&1242.561604	1	1	1	0.531293	1	1	-1	-1
sp|Q13705|AVR2B_HUMAN-JSSGTIELVK&1249.640194	1	1	1	1	1	1	1	1
sp|Q92673|SORL_HUMAN-JSTVEYTLNK&1370.656564	1	1	0.848199	1	1	1	1	1
sp|Q13361|MFAP5_HUMAN-JTTAECWDEK&1455.582414	1	1	1	1	-1	-1	-1	-1
sp|P04066|FUCO_HUMAN-JTTSVWYTSK&1388.645994	0.213109	0.364589	0.209151	0.190365	1	0.583165	1	0.329114
sp|P07858|CATB_HUMAN-JTTWQAGHNFYNVDMSYLK&2491.111434	1	-1	1	0.734021	0.837029	0.789902	1	0.866189
sp|P26951|IL3RA_HUMAN-JVTDIECVK&1279.596604	1	1	-1	-1	-1	1	1	1
sp|Q9NQS3|PVRL3_HUMAN-JYSLNDATITLHNIGFSDSGK&2469.165984	1	1	1	1	0.896453	0.826149	0.814701	1
sp|P13727|PRG2_HUMAN-KDGAVESISVPDMVDKJLTCPEEEDTVK&3307.532364	1	1	1	1	1	1	1	1
sp|P15328|FOLR1_HUMAN-KJACCSTJTSQEAHK&1937.820764	0.958822	0.966342	0.954777	0.95556	-1	1	-1	-1
sp|Q13433|S39A6_HUMAN-KTJESVSEPR&1348.647064	1	0.977448	1	1	-1	-1	-1	-1
sp|Q8TDY8|IGDC4_HUMAN-LATLADFSLHPESQTVEEJGTAR&2688.287904	-1	1	1	-1	1	0.873317	1	0.75406
sp|P25445|TNR6_HUMAN-LCDEGHGLEVEIJCTR&2103.920144	1	1	1	1	1	1	1	1
sp|P27487|DPP4_HUMAN-LDFIILJETK&1407.749744	0.740232	0.131703	0.947789	1	0.691892	0.599002	0.859846	0.801913
sp|Q14314|FGL2_HUMAN-LDGSTJFTR&1212.562274	0.433009	0.136512	0.404145	0.452102	-1	1	-1	1
sp|P02749|APOH_HUMAN-LGJWSAMPSCK&1468.632674	0.328447	0.272957	0.137876	0.173995	0.347138	0.0542232	0.224962	0.0810974
sp|P19440|GGT1_HUMAN/sp|Q14390|GGTL2_HUMAN/sp|Q9BX51|GGTL1_HUMAN-LHNQLLPJVTTVER&1835.974154	0.765077	0.854334	1	0	0	0.766534	-1	0
sp|Q9H9P2|CHODL_HUMAN-LIESMLQJLTK&1491.785474	1	1	1	1	1	1	1	1
sp|Q8WWB7|GLMP_HUMAN-LLEFDSTJVSDTAAKPLGR&2236.122334	1	1	-1	-1	1	-1	0	-1
sp|Q07699|SCN1B_HUMAN-LLFFENYEHJTSVVK&2041.999694	-1	1	-1	1	1	1	1	1
sp|Q9Y6R7|FCGBP_HUMAN-LLISSLSESPASVSILSQADJTSK&2649.359664	0.313886	0.480787	0.551307	0.45404	0.733018	0.517641	0.528544	0.592926
sp|Q8IZF2|AGRF5_HUMAN-LNVGFQEDLMJTSSALYR&2260.068184	1	1	1	1	1	1	1	1
sp|Q9Y4L1|HYOU1_HUMAN-LSALDNLLJHSSMFLK&2005.019054	1	1	1	1	0.97921	0.988244	0.935953	0.985273
sp|P40189|IL6RB_HUMAN-LTVJLTNDR&1247.635774	1	1	0.990694	1	0.991213	0.979654	1	1
sp|Q5T601|AGRF1_HUMAN-MCPQJTSIPIR&1518.717074	0.348312	0.0480525	0.402738	1	1	1	1	1
sp|P08603|CFAH_HUMAN-MDGASJVTCINSR&1626.697794	1	-1	-1	-1	0.616094	1	0.713658	-1
sp|P98164|LRP2_HUMAN-MLAQHCVDAJNTFCFDNPR&2512.056984	1	1	1	1	1	1	1	0.965584
sp|Q15116|PDCD1_HUMAN-MSPSJQTDK&1209.518364	1	1	1	-1	-1	-1	-1	-1
sp|Q6UWN5|LYPD5_HUMAN-MTVGJFSVPVYIR&1684.849464	1	1	-1	-1	-1	-1	1	-1
sp|Q86SQ4|GP126_HUMAN-NJESLDEGLR&1348.610684	1	-1	-1	0	-1	-1	1	1
sp|P98160|PGBM_HUMAN-NQELEDNVHISPJGSIITIVGTR&2708.361734	1	1	-1	1	1	1	1	1
sp|Q92563|TICN2_HUMAN-PFFJSCDTYK&1480.618064	1	1	1	1	1	1	-1	1
sp|Q96JQ0|PCD16_HUMAN-PGPDGTPVPELVVTGELDREJR&2549.260954	1	1	1	1	1	1	1	1
sp|P07602|SAP_HUMAN-PJMSASCK&1096.452924	1	1	0.896269	-1	-1	-1	-1	-1
sp|P28906|CD34_HUMAN-PQCLLLVLAJR&1498.817774	1	1	1	1	1	1	1	1
sp|P49788|TIG1_HUMAN-PRPTIJVTCTR&1516.766804	0.913936	0.824204	-1	1	1	0.861589	1	0.922345
sp|P02749|APOH_HUMAN-PSAGJNSLYR&1280.599714	0.676383	0.388438	0.033784	0.00744982	-1	-1	-1	-1
sp|P21754|ZP3_HUMAN-PVGJLSIVR&1156.645214	1	1	1	-1	1	1	-1	1
sp|P55290|CAD13_HUMAN-QEDLSVGSVLLTVJATDPDSLQHQTIR&3138.568094	1	1	1	1	1	1	1	1
sp|O60896|RAMP3_HUMAN-QFFSJCTVDR&1475.635124	-1	1	1	-1	1	1	1	1
sp|O75071|EFC14_HUMAN-QSLDQVTJR&1262.610294	1	1	-1	-1	-1	-1	1	-1
sp|P28300|LYOX_HUMAN-RDPGAAVPGAAJASAQQPR&2036.003564	1	1	1	1	1	1	1	1
sp|P13611|CSPG2_HUMAN-RGQFESVAPSQJFSDSSESDTHPFVIAK&3269.511304	1	1	1	1	0	0	1	-1
sp|P48745|NOV_HUMAN-SADPSJQTGICTAVEGDNCVFDGVIYR&3147.376124	0.142638	0.177532	0.313248	1	0.417065	0.617428	0.331611	0.812264
sp|Q08722|CD47_HUMAN-SDAVSHTGJYTCEVTELTR&2342.033254	1	0.748174	1	1	0.887358	0.584502	0.769029	0.639304
sp|Q9H159|CAD19_HUMAN-SDLDNGJNSFQYK&1703.727494	1	1	1	1	-1	-1	1	-1
sp|Q9NR99|MXRA5_HUMAN-SDSGJYTCLVR&1473.640594	1	-1	1	1	1	1	1	1
sp|Q6V0I7|FAT4_HUMAN-SHALLLYNYDJQTGDR&2081.965424	0.766804	-1	-1	1	1	1	1	1
sp|Q92765|SFRP3_HUMAN-SLPWJMTK&1178.564194	1	1	1	1	1	1	1	1
sp|Q9UKJ1|PILRA_HUMAN-SPQJETLYSVLK&1580.793394	1	1	1	1	1	1	1	1
sp|Q9BTY2|FUCO2_HUMAN-SQJDTVTPDVWYTSKPK&2168.027364	0.219452	0.146049	0.174616	0.109001	0.150202	0.222916	0.142242	0.147509
sp|Q9HCM3|K1549_HUMAN-STQGFLJGSEVSELLR&1938.953484	0.502648	0.102565	0.466772	-1	0.794715	0.573699	0	1
sp|P31371|FGF9_HUMAN-TGFHLEIFPJGTIQGTR&2090.043304	-1	0.939174	0.962411	1	0.826173	0.777159	0.853651	1
sp|Q9NT99|LRC4B_HUMAN-TGTSMTSVNWLTPJGTLMTHGSYR&2814.295304	0	1	1	-1	1	1	1	1
sp|Q96GW7|PGCB_HUMAN-TLFLFPJQTGFPNK&1825.925084	1	1	1	-1	0.634931	1	1	1
sp|O43490|PROM1_HUMAN-TLLJETPEQIK&1487.771934	1	1	1	1	0.363018	1	1	1
sp|Q92859|NEO1_HUMAN-TLSDVPSAAPQJLSLEVR&2099.074654	1	1	1	1	0.954916	0.957681	1	0.961957
sp|Q5JXA9|SIRB2_HUMAN-TSEPLNCDYSIYIHJVTR&2384.095444	0.74101	1	1	1	1	1	0.0747413	1
sp|P98164|LRP2_HUMAN-TWSAFQJGTDR&1484.653214	0.891418	0.900362	1	1	0.938424	0.81824	0.871534	1
sp|A6NGN9|IGLO5_HUMAN/sp|Q13449|LSAMP_HUMAN/sp|Q14982|OPCM_HUMAN/sp|Q9P121|NTRI_HUMAN-VAWLJR&960.502914	0	0.00151825	0	0	-1	0	-1	0
sp|P19022|CADH2_HUMAN-VDIIVAJLTVTDK&1602.871654	1	1	1	1	1	0.996313	1	1
sp|P24821|TENA_HUMAN-VEAAQJLTLPGSLR&1670.883944	1	1	1	1	1	1	1	1
sp|Q9HBB8|CDHR5_HUMAN-VEEDTKVJSTVIPETQLQAEDR&2703.308694	0.969393	0.963179	0.876668	1	0.968167	0.936473	0.955431	1
sp|P32942|ICAM3_HUMAN-VELAPLPPWQPVGQJFTLR&2364.247814	0.97183	1	0.994436	1	0.981102	0.982773	0.989613	0.979411
sp|P55283|CADH4_HUMAN-VETVVAJLTVMDR&1648.834214	-1	0.656564	-1	-1	1	1	1	1
sp|P07333|CSF1R_HUMAN-VMVEAYPGLQGFJWTYLGPFSDHQPEPK&3409.596544	-1	1	1	-1	1	1	1	1
sp|P34810|CD68_HUMAN-VMYTTQGGGEAWGISVLNPJK&2424.163154	1	1	1	1	1	1	1	1
sp|P10253|LYAG_HUMAN-VTVLGVATAPQQVLSNGVPVSJFTYSPDTK&3291.687474	1	1	1	1	1	1	1	1
sp|P06870|KLK1_HUMAN-VVELPTEEPEVGSTCLASGWGSIEPEJFSFPDDLQCVDLK&4653.130264	1	1	1	-1	1	1	1	1
sp|Q13421|MSLN_HUMAN-WJVTSLETLK&1392.713694	1	1	1	1	1	1	1	1
sp|P43251|BTD_HUMAN-WNVNAPPTFHSEMMYDJFTLVPVWGK&3282.515464	1	1	-1	1	1	1	1	0.981484
sp|Q7Z6M3|MILR1_HUMAN-YDREPAEFJLTK&1684.794454	1	0.939557	1	1	1	1	1	1
sp|P11117|PPAL_HUMAN-YEQLQJETR&1382.631414	0.00541558	0.005689	0.00255353	0	-1	0	-1	-1
sp|P00734|THRB_HUMAN-YPHKPEIJSTTHPGADLQEJFCR&2913.335194	0.0600222	0.0537046	0.0145396	-1	0.08282	0.0336639	0.0519617	0.0411181
sp|P15586|GNS_HUMAN-YYJYTLSINGK&1537.730044	0.791049	1	1	1	1	1	1	0.64223
sp|P17181|INAR1_HUMAN-AEKEJTSSWYEVDSFTPFR&2495.112884	-1	1	-1	-1	1	1	1	1
sp|P16109|LYAM3_HUMAN-AFQYDTJCSFR&1610.667144	1	1	1	1	1	1	1	1
sp|Q9Y2E5|MA2B2_HUMAN-ALHALJVTWR&1382.730684	-1	0.277737	0.0666461	-1	0.145025	0.070513	0	0.183488
sp|P07911|UROM_HUMAN-CNTAAPMWLJGTHPSSDEGIVSR&2718.201404	-1	0.924015	0.930008	-1	1	0.909592	0.91645	0.919735
sp|P19801|AOC1_HUMAN-DCSMPPPFSYJGTYRPV&2189.939804	1	0.92512	0.97062	1	1	1	1	1
sp|P16284|PECA1_HUMAN-DDVLFYJISSMK&1633.754564	1	1	1	1	0.855539	0.864851	0.919326	0.90887
sp|P12821|ACE_HUMAN-ELYEPIWQJFTDPQLR&2251.079734	1	0.727224	1	-1	0.81574	1	1	1
sp|P69849|NOMO3_HUMAN/sp|Q15155|NOMO1_HUMAN/sp|Q5JPE7|NOMO2_HUMAN-ENVGIYJLSK&1338.666734	0.650056	0.0815066	0.0771189	0.0170377	0.427597	0.174612	0.0830464	0.308357
sp|Q96MM7|H6ST2_HUMAN-EQNDJTSJGTNDYIGSVEK&2286.972434	-1	1	-1	-1	1	1	0.60771	1
sp|P31997|CEAM8_HUMAN-ETIYPJASLLMR&1609.802184	1	1	1	1	1	1	1	1
sp|P07911|UROM_HUMAN-FALLMTNCYATPSSJATDPLK&2517.176744	1	0.954471	0.964186	1	0.978433	0.978111	0.972328	0.978625
sp|P58499|FAM3B_HUMAN-GINIAIVNYVTGJVTATR&2078.100804	1	1	-1	-1	1	0.77327	0.722115	1
sp|P22607|FGFR3_HUMAN-GJYTCVVENK&1385.613314	0.313178	0.52926	0.273422	0.619875	-1	1	-1	1
sp|P26718|NKG2D_HUMAN-GYIEJCSTPNTYICMQR&2308.976264	-1	1	1	1	1	1	1	1
sp|P06280|AGAL_HUMAN-HMSLALJR&1143.570674	0.0337318	0.740971	0.810287	0.64279	-1	0.233668	-1	0.720422
sp|Q8IZF2|AGRF5_HUMAN-HNFJASSVSWCSK&1725.741704	1	1	-1	1	1	1	1	1
sp|O75326|SEM7A_HUMAN-HPSCWNLVJGTVVPLGEMR&2368.130414	1	1	1	1	0.822739	0.86851	1	0.834042
sp|Q9NU53|GINM1_HUMAN-HSJYTLPLEESMLYSISR&2342.110044	0.127683	0.191591	0.217331	0	0.298023	0.201497	0.406221	0.234833
sp|P14151|LYAM1_HUMAN-IGGIWTWVGTJK&1533.782774	1	1	1	1	1	1	1	1
sp|Q8NDA2|HMCN2_HUMAN-JFSVEVLVPPSIENEDLEEVIK&2701.358604	1	1	1	1	0.599408	0.574228	0.343932	0.747546
sp|Q9NPC4|A4GAT_HUMAN-JLTNVLGTQSR&1404.720904	1	1	1	1	1	1	1	1
sp|Q9H741|CL049_HUMAN-KDLLVJGCCNVNVPSTK&2120.024214	-1	1	-1	1	1	1	1	1
sp|P19440|GGT1_HUMAN-LAFATMFJSSEQSQK&1890.866974	0.160803	1	1	1	0.977387	1	1	0.885516
sp|P19320|VCAM1_HUMAN-LDNGNLQHLSGJATLTLIAMR&2454.253704	1	1	1	1	1	1	1	1
sp|Q8WVQ1|CANT1_HUMAN-LGQAPANWYJDTYPLSPPQR&2490.181564	1	1	0.889172	0.852528	1	0.941898	1	0.90835
sp|Q9NZU1|FLRT1_HUMAN-LQJLTELSLVR&1487.819554	1	1	1	1	1	1	1	0.376895
sp|P22607|FGFR3_HUMAN-LQVLJASHEDSGAYSCR&2108.943314	1	0.822257	0.369346	0	0.757177	0.647971	0.548849	0.375352
sp|Q86UX2|ITIH5_HUMAN-LTEDPAGPSQJLTHPLLLQVGEGPEAVLTVK&3425.793014	1	1	1	-1	1	1	1	1
sp|O00533|NCHL1_HUMAN-LTWEAGADHNSJISEYIVEFEGNKEEPGR&3493.591004	-1	-1	-1	-1	1	1	1	0.967759
sp|O15230|LAMA5_HUMAN-LVGGPVAGGDPJQTIR&1752.900654	1	1	0.651188	-1	0.546933	0.434861	1	1
sp|Q14789|GOGB1_HUMAN-QMSIHMEELKIJISR&2063.002744	-1	0.523276	0.819868	-1	0.739	0.723168	0.794274	0.832415
sp|O43657|TSN6_HUMAN-QYJSTGDYR&1305.547334	-1	1	-1	-1	1	1	-1	1
sp|O43451|MGA_HUMAN-RQDPVSWDVAFVJISR&2091.038544	0.984901	0.829635	0.921133	0.886998	0.775403	0.592797	0.80179	0.857911
sp|Q8NCC3|PAG15_HUMAN-SAVSTSWLLPYJYTWSPEK&2431.158374	-1	1	1	1	1	1	1	1
sp|O75144|ICOSL_HUMAN-TDNSLLDQALQJDTVFLNMR&2510.195914	1	1	1	1	1	1	1	1
sp|P32004|L1CAM_HUMAN-THJLTDLSPHLR&1605.811114	-1	0.964341	0.923848	-1	0.964239	0.956217	0.954353	0.966636
sp|Q8IZF2|AGRF5_HUMAN-TVDVCCHFTNAAJNSVWSPSMK&2727.172744	1	1	1	1	1	1	1	1
sp|P04062|GLCM_HUMAN-TYTYADTPDDFQLHJFSLPEEDTK&3049.335284	0.0430768	0.199148	0.183141	0.470046	1	1	-1	1
sp|Q10588|BST1_HUMAN-VALDKDPCSVLPSDYDLFIJLSR&2839.394994	1	1	1	1	1	1	1	1
sp|P45877|PPIC_HUMAN-VIDGMTVVHSIELQATDGHDRPLTJCSIINSGK&3779.845864	1	1	1	-1	1	1	1	1
sp|Q9ULB1|NRX1A_HUMAN-VJSSQVLPVDSGEVK&1759.884004	0.620477	0.747113	0.529581	0.605739	1	0.735105	0.934854	0.767856
sp|Q92823|NRCAM_HUMAN-VNVVJSTLAEVHWDPVPLK&2319.211094	1	1	-1	-1	1	1	1	0.79869
sp|O75054|IGSF3_HUMAN-VQGJSTLLHITDLQAR&1968.027654	1	1	1	1	1	1	1	1
sp|Q9C0H2|TTYH3_HUMAN-VWDTAVGLJHTAEPSLQTLER&2539.255474	1	1	1	1	1	1	1	1
sp|P15309|PPAP_HUMAN-VYDPLYCESVHJFTLPSWATEDTMTK&3322.468614	1	0.979961	1	1	0.95487	0.959473	0.963303	0.938425
sp|Q92673|SORL_HUMAN-VYGQVSLJDSHNQMVVHWAGEK&2700.260234	-1	-1	-1	-1	1	1	1	1
sp|Q9HC56|PCDH9_HUMAN-YIISPIJGTVYLSEKDPVNTK&2553.321414	0.00970696	0.0801925	0	0	0.18644	0.0735124	0.0439187	0.49198
sp|O75752|B3GL1_HUMAN-YLLNLJHSEK&1432.719824	-1	1	-1	-1	1	1	1	1
sp|P16070|CD44_HUMAN-AFJSTLPTMAQMEK&1802.806674	0.00483807	0	0.801561	0.755187	-1	-1	1	0
sp|P27930|IL1R2_HUMAN-CVLTFAHEGQQYJITR&2139.005524	1	1	1	1	1	1	1	1
sp|P48307|TFPI2_HUMAN-DEGLCSAJVTR&1423.624944	0.666941	0.814233	0.724328	0.6487	1	1	1	0.832294
sp|Q6UX06|OLFM4_HUMAN-DQNTPVVHPPPTPGSCGHGGVVJISK&2853.371584	0.900951	0.943714	0.96875	0.896534	0.884665	0.858711	0.983263	0.905232
sp|P28827|PTPRM_HUMAN-EJDTHCIDFHYFVSSK&2200.937164	-1	-1	-1	0	1	1	1	1
sp|Q11201|SIA4A_HUMAN-ELGDJVSMILVPFK&1763.901564	1	1	1	1	1	1	1	1
sp|Q4LDE5|SVEP1_HUMAN-ESSCLAJSSWSHSPPVCEPVK&2560.121024	1	-1	1	1	1	1	1	1
sp|P01892|1A02_HUMAN/sp|P10316|1A69_HUMAN-GYYJQSEAGSHTVQR&1898.839494	0	0	1	1	0.572988	0.520531	0.602939	0.62684
sp|O43451|MGA_HUMAN-IDCYPDENGASAEJCTAR&2244.889954	0.644804	0	0.297462	-1	0.407011	-1	1	0.620371
sp|P98164|LRP2_HUMAN-IYYSDYLNQMINSMAEDGSJR&2686.152704	1	1	1	1	1	1	1	1
sp|P50897|PPT1_HUMAN-JHSIFLADINQER&1758.853704	1	0.945752	0.921614	1	0.744399	0.808611	0.928108	0.556098
sp|O00391|QSOX1_HUMAN-JSTLDPGKPEMMK&1665.759004	-1	0	1	-1	-1	-1	-1	-1
sp|P19320|VCAM1_HUMAN-KLDNGNLQHLSGJATLTLIAMR&2582.348664	-1	-1	1	-1	1	1	1	1
sp|Q13421|MSLN_HUMAN-LAFQNMJGSEYFVK&1849.855674	-1	1	1	1	1	1	1	1
sp|P02788|TRFL_HUMAN-PFLJWTGPPEPIEAAVAR&2167.095004	1	-1	1	1	1	1	0.521092	1
sp|Q9UEF7|KLOT_HUMAN-PVFIDGDYPESMKNJLSSILPDFTESEKK&3502.670164	-1	1	1	-1	-1	1	1	1
sp|A6NGN9|IGLO5_HUMAN-SMLLFAJVSAR&1410.717734	1	1	1	1	1	1	1	1
sp|P02788|TRFL_HUMAN-TAGWNVPIGTLRPFLJWTGPPEPIEAAVAR&3432.783054	-1	-1	1	1	0.816693	1	1	0.917708
sp|Q8NCC3|PAG15_HUMAN-VFVQTPTIJYTLR&1753.925074	0	0.188214	0.136042	0.122649	0.169851	0.0866651	0.160602	0.0720912
sp|Q8NDA2|HMCN2_HUMAN-VLGEAPYJLTWVR&1719.883204	0	0.255736	0.198609	1	1	1	1	1
sp|Q06828|FMOD_HUMAN-VPNNALEGLEJLTALYLQHNEIQEVGSSMR&3541.735894	-1	-1	-1	-1	1	1	1	1
sp|Q12913|PTPRJ_HUMAN-AALSWSNGJGTASCR&1753.768984	1	-1	-1	-1	1	1	1	1
sp|P98164|LRP2_HUMAN-AJDSFGEASIIFSNGR&1886.864664	-1	-1	1	1	1	1	1	1
sp|Q9P232|CNTN3_HUMAN-AJGTTHLVVTEPTR&1697.858464	1	1	1	1	1	1	1	1
sp|Q9Y5Y7|LYVE1_HUMAN-ANQQLJFTEAK&1465.704914	0	0	0	0.544693	1	0.593179	0.823386	0.620132
sp|O43291|SPIT2_HUMAN-CATVTEJATGDLATSR&1868.842214	1	1	1	0.905075	1	1	1	1
sp|Q9BYF1|ACE2_HUMAN-CDISJSTEAGQK&1511.640994	1	1	-1	1	1	1	1	1
sp|P08582|TRFM_HUMAN-DCDVLTAVSEFFJASCVPVNNPK&2785.257524	-1	-1	-1	-1	1	1	1	1
sp|Q9HCN3|TMM8A_HUMAN-DCVSJGSLGCPVR&1622.702874	-1	-1	-1	1	1	1	1	1
sp|P54289|CA2D1_HUMAN-DDLDPEKJDSEPGSQR&2003.855614	1	-1	-1	1	1	1	1	1
sp|P78324|SHPS1_HUMAN/sp|Q5TFQ8|SIRBL_HUMAN-DGTYNWMSWLLVJVSAHR&2351.100484	1	-1	-1	-1	1	1	1	1
sp|P32004|L1CAM_HUMAN-DHVVVPAJTTSVILSGLR&2080.116464	1	1	1	-1	1	1	1	1
sp|O43567|RNF13_HUMAN-DJSSGTFIVLIR&1523.783164	1	1	1	1	1	1	1	1
sp|O75882|ATRN_HUMAN-DLDMFIJASK&1371.622824	-1	-1	-1	-1	1	-1	1	1
sp|P22105|TENX_HUMAN-DWEDYAHGFGJISGEFWLGNEALHSLTQAGDYSMR&4175.823204	-1	-1	-1	-1	-1	1	1	1
sp|O94856|NFASC_HUMAN-EAWNJVTVWGSR&1620.753264	1	1	1	1	1	1	1	1
sp|Q9NQ36|SCUB2_HUMAN-EDTVLEVTESJTTSVVDGDKR&2496.171534	1	1	1	1	1	1	1	1
sp|P22304|IDS_HUMAN-EDVQALJISVPYGPIPVDFQR&2559.285704	0	0.791853	0.805983	1	1	1	1	1
sp|Q08380|LG3BP_HUMAN-EPGSJVTMSVDAECVPMVR&2296.002154	0.190644	0	-1	-1	0	-1	0	-1
sp|O14917|PCD17_HUMAN-ETQDEYJVTIVAR&1739.821394	0.404048	0.402862	0.0209847	0	0.0349458	0.0257123	0.207383	0.0249236
sp|P50897|PPT1_HUMAN-FLJDSIVDPVDSEWFGFYR&2508.148544	-1	1	-1	-1	0.667483	0.770375	1	0.773335
sp|Q8IZF2|AGRF5_HUMAN-FSIYTALFNJMTSVSK&2024.976514	1	-1	-1	1	1	1	-1	1
sp|Q15846|CLUL1_HUMAN-GLCGELDQJLSR&1563.719914	-1	1	-1	1	1	1	1	1
sp|Q9Y6R7|FCGBP_HUMAN-GLCVLSVGAJLTTFDGAR&2053.015034	-1	1	-1	1	1	1	1	1
sp|P32004|L1CAM_HUMAN-GPWQEQIVSDPFLVVSJTSTFVPYEIK&3282.633644	-1	-1	-1	-1	0.356292	0.592482	0.427911	0.414565
sp|A6NI73|LIRA5_HUMAN-HILQVWSEPSDLLEIPVSGAADJLSPSQJK&3446.720574	-1	-1	-1	-1	1	1	1	1
sp|Q15262|PTPRK_HUMAN-IAVDWESLGYJITR&1838.905064	-1	-1	-1	-1	1	1	-1	1
sp|Q9H5V8|CDCP1_HUMAN-IGTFCSJGTVSR&1500.687884	-1	1	-1	-1	1	1	1	1
sp|Q12860|CNTN1_HUMAN-ILIWEDGSLEINJITR&2088.073934	1	1	1	-1	1	1	1	1
sp|P08603|CFAH_HUMAN-IPCSQPPQIEHGTIJSSR&2223.059024	1	-1	0	0	0.946477	1	0.844472	0.891929
sp|P08603|CFAH_HUMAN-ISEEJETTCYMGK&1763.723004	-1	-1	0	0	0.283429	0.26399	0.359573	0.417454
sp|Q12866|MERTK_HUMAN-ISVQVHJATCTVR&1686.835944	1	1	1	1	1	1	1	1
sp|O00462|MANBA_HUMAN-IVELFVJISK&1363.759914	-1	-1	0	0	0.047742	0.0690834	0.121698	0.105936
sp|P08F94|PKHD1_HUMAN-IVJVTVIR&1115.655054	1	-1	-1	1	1	1	1	1
sp|P42785|PCP_HUMAN-JISSHTNIVFSNGELDPWSGGGVTK&2818.340994	0	0.0241651	0	0	0.0309407	0.0217914	0.122367	0.0273908
sp|O75309|CAD16_HUMAN-JLSYEAAPSHEVVVVVQSVAK&2428.248594	1	1	-1	1	1	1	1	1
sp|Q8N6Q3|CD177_HUMAN-JTSCDSGLGCQDTLMLIESGPQVSLVLSK&3311.557134	1	-1	-1	-1	1	1	1	1
sp|P55058|PLTP_HUMAN-JWSLPNR&1088.525104	1	0.130706	1	1	1	1	1	1
sp|Q9H756|LRC19_HUMAN-JYTLIPADIK&1349.707864	1	1	-1	-1	1	0.453715	1	0.904872
sp|P05556|ITB1_HUMAN-KDTCTQECSYFJITK&2096.903084	0.828252	0.686477	1	1	0.769166	1	1	1
sp|P03951|FA11_HUMAN-LETTVJYTDSQR&1628.752984	0	0.00867731	0	0.0262609	0.237874	0.0436372	0.0235696	0.0110262
sp|O43451|MGA_HUMAN-LEVJISQSTYK&1483.740624	-1	-1	-1	-1	1	1	1	1
sp|Q9P0K1|ADA22_HUMAN-LFEFSLDDLPSEFQQVJITPSK&2756.343284	1	1	1	1	-1	-1	1	-1
sp|P02750|A2GL_HUMAN-LPPGLLAJFTLLR&1626.934524	0.912507	0.810041	0.39854	0.273705	0.419396	0.613687	0.298248	0.399812
sp|P36980|FHR2_HUMAN/sp|Q03591|FHR1_HUMAN-LQNNENJISCVER&1791.805764	0.440084	1	-1	-1	0.371624	0	0	0
sp|Q07954|LRP1_HUMAN-LTSCATJASICGDEAR&1927.825174	-1	-1	-1	-1	1	-1	1	1
sp|Q53RD9|FBLN7_HUMAN-LVGPSSVVCLPJGTWTGEQPHCR&2753.290154	1	1	1	1	0.687008	1	1	1
sp|Q01459|DIAC_HUMAN-LVMGVPWYGYDYTCLJLSEDHVCTIAK&3406.555984	1	-1	0	-1	0.660452	0.819083	1	0.860018
sp|Q9UEF7|KLOT_HUMAN-NJLSSILPDFTESEK&1895.900044	1	-1	-1	-1	1	0.895401	1	1
sp|Q96BF6|NACC2_HUMAN/sp|Q96RE7|NACC1_HUMAN-NTLAJSCGTGIR&1465.683134	-1	-1	-1	1	0.92219	0.835817	0.86821	1
sp|P01876|IGHA1_HUMAN/sp|P01877|IGHA2_HUMAN-PALEDLLLGSEAJLTCTLTGLR&2559.310214	-1	-1	-1	-1	0.0295399	0.0227776	0.0390625	0.0428763
sp|P21754|ZP3_HUMAN/sp|Q6PJE2|POZP3_HUMAN-PGPDTLQFTVDVFHFAJDSR&2465.149954	-1	1	-1	-1	1	-1	-1	1
sp|Q92832|NELL1_HUMAN-PGYVGJGTICR&1395.645284	0	0	0	0	1	1	1	1
sp|P05026|AT1B1_HUMAN-PKPPKJESLETYPVMK&2060.050014	1	1	1	1	1	1	1	1
sp|P19801|AOC1_HUMAN-PLHQFFLJTTGFSFQDCHDR&2669.196914	-1	-1	-1	-1	1	1	1	1
sp|P01876|IGHA1_HUMAN/sp|P01877|IGHA2_HUMAN-PTHVJVSVVMAEVDGTCY&2179.976594	1	1	0.313484	-1	0.368836	0.372477	0.499903	0.455284
sp|Q92485|ASM3B_HUMAN-PWLSJESIALFK&1606.824304	-1	-1	-1	-1	1	-1	-1	-1
sp|P02763|A1AG1_HUMAN-QDQCIYJTTYLNVQR&2117.968794	1	0	0	0.0208054	0.137209	0.11954	0.0900657	0.0454759
sp|O43493|TGON2_HUMAN-QEEAGVRPSAGJVSTHPSLSQR&2509.215734	1	-1	1	1	1	1	1	1
sp|Q92563|TICN2_HUMAN-QJGSASSVAGPASGLDK&1747.822464	0.150445	0.0710313	0.0936404	0	0.0715185	0.0927002	0	0.0322426
sp|P10909|CLUS_HUMAN-QLEEFLJQSSPFYFWMNGDR&2710.200994	-1	-1	-1	1	1	1	0.94203	0.937024
sp|O14498|ISLR_HUMAN-SLDLSHNLISDFAWSDLHJLSALQLLK&3252.666684	-1	-1	-1	1	1	1	1	1
sp|Q11206|SIA4C_HUMAN-SMAGSGHJVSQEALAIK&1901.915324	1	1	-1	-1	1	1	-1	-1
sp|P29622|KAIN_HUMAN-SQILEGLGFJLTELSESDVHR&2546.250054	0.015756	0	0.531156	0.455639	0.731664	0.488055	0.897998	0.298154
sp|Q86VZ4|LRP11_HUMAN-SSDJVSVTVLR&1378.694014	1	1	1	1	1	1	1	1
sp|Q12913|PTPRJ_HUMAN-SSTFYJITVCPVLGDIEGTPGFLQVHTPPVPVSDFR&4149.040524	-1	-1	-1	-1	1	1	1	1
sp|Q4LDE5|SVEP1_HUMAN-SVCLEJGTWTSPPICR&2078.940144	1	-1	1	1	1	1	1	1
sp|Q5SZK8|FREM2_HUMAN-TGSICASENIJDTLTR&1953.894974	0.0494081	1	1	0.580809	0.182577	0.529941	0	0.88823
sp|Q7Z7M0|MEGF8_HUMAN-TGYTMDJMTGLCR&1737.700824	-1	-1	-1	-1	1	-1	-1	-1
sp|P05543|THBG_HUMAN-TLYETEVFSTDFSJISAAK&2325.090024	0.0748061	1	0	0	0.558737	0.410175	0.46403	0.397445
sp|P30530|UFO_HUMAN-VACTSSQGPSSWTHWLPVETPEGVPLGPPEJISATR&4046.932044	1	1	1	1	1	1	1	1
sp|P16444|DPEP1_HUMAN-VFEAVEQASJLTQAPEEEPIPLDQLGGSCR&3486.646084	-1	1	1	-1	1	1	1	1
sp|Q9NZU0|FLRT3_HUMAN-VFFNLVJLTELSLVR&1966.077554	-1	-1	-1	-1	-1	1	1	1
sp|Q6UX71|PXDC2_HUMAN-VJLSFDFPFYGHFLR&2060.999634	-1	-1	-1	1	0.574197	0.899489	0.74201	0.671199
sp|P11047|LAMC1_HUMAN-VJNTLSSQISR&1420.715814	-1	-1	1	1	1	1	1	1
sp|P07333|CSF1R_HUMAN-VLTLNLDQVDFQHAGJYSCVASNVQGK&3179.519364	1	1	1	1	1	1	1	1
sp|A8MVW5|HECA2_HUMAN-VNIQGJGTLSASQK&1618.816254	1	1	1	1	1	1	1	1
sp|P36955|PEDF_HUMAN-VTQJLTLIEESLTSEFIHDIDR&2775.381464	0.263913	-1	0	-1	0.868066	0.726157	0.805125	1
sp|Q99523|SORT_HUMAN-WGSDNTIFFTTYAJGSCK&2270.979034	1	0.0878177	1	1	0.193603	1	0.826203	0.732062
sp|P02760|AMBP_HUMAN-WJITMESYVVHTNYDEYAIFLTK&3055.416104	-1	-1	-1	-1	0.375504	0.22542	0.206878	0.226728
sp|O00754|MA2B1_HUMAN-WWHQQTJATQEVVR&1984.939174	1	-1	1	-1	1	1	1	1
sp|Q96PD2|DCBD2_HUMAN-YCGLGLQMJHSIESK&1938.881564	1	-1	-1	1	1	1	1	1
sp|P38571|LICH_HUMAN-YDLPASINFILJK&1709.887624	0.862028	1	0.886234	0.883026	1	1	1	1
sp|O60449|LY75_HUMAN-YJVSSLEK&1141.550304	-1	-1	-1	1	1	1	1	1
sp|P24855|DNAS1_HUMAN-YLFVYRPDQVSAVDSYYYDDGCEPCGJDTFNR&4087.715254	1	-1	0.838574	1	1	0.969851	1	0.972873
sp|Q6V0I7|FAT4_HUMAN-YSISSGNEEGIFAIJSSTGILTLAK&2774.386204	0.00411775	0	0	-1	-1	1	0	-1
sp|Q8NHL6|LIRB1_HUMAN-DFLQLAGAQPQAGLSQAJFTLGPVSR&2888.466874	0.484557	1	1	0.636596	1	0.793564	0.602555	1
sp|Q7Z7H5|TMED4_HUMAN-FTFTSHTPGDHQICLHSJSTR&2645.192894	0	0.463089	0	-1	1	1	1	1
sp|Q9NZP8|C1RL_HUMAN-GFLALYQTVAVJYSQPISEASR&2616.307164	0.545151	0	0	0	0.374501	0.205531	0.569542	0.433553
sp|Q6EMK4|VASN_HUMAN-LPASLAEYTVTQLRPJATYSVCVMPLGPGR&3479.742884	1	1	-1	1	1	1	1	1
sp|Q8N6Q3|CD177_HUMAN-MSIQGCVAQPSSFLLJHTR&2364.120234	-1	-1	-1	-1	-1	-1	-1	0
sp|O00584|RNT2_HUMAN-QDQQLQJCTEPGEQPSPK&2286.007044	-1	1	-1	1	-1	1	1	1
sp|P15586|GNS_HUMAN-TPMTJSSIQFLDNAFR&2059.952094	0	0	0	-1	0	-1	0	0
sp|P27930|IL1R2_HUMAN-VFLGTGTPLTTMLWWTAJDTHIESAYPGGR&3494.681684	1	1	1	1	1	1	1	1
sp|Q07954|LRP1_HUMAN-WTGHJVTVVQR&1498.752874	1	1	1	1	1	1	-1	1
sp|Q8IYS5|OSCAR_HUMAN-LRJMSFVLYR&1516.770814	1	1	1	-1	1	1	1	1
sp|P10909|CLUS_HUMAN-MLJTSSLLEQLNEQFNWVSR&2627.253754	-1	-1	1	-1	0.947228	0.911688	0.954712	0.957278
sp|P43251|BTD_HUMAN-WNVNAPPTFHSEMMYDJFTLVPVWGK&3298.510374	-1	-1	-1	-1	1	1	1	1
sp|P15586|GNS_HUMAN-MLVANIDLGPTILDIAGYDLJK&2561.329884	-1	-1	-1	-1	1	1	1	1
